# Supplementary material for: Epidemiology of kerosene poisoning in Saudi Arabia: a retrospective analysis
Source: PeerJ. 2025 Mar 19;13:e19094. doi: 10.7717/peerj.19094 (PMC11929502; doi:10.7717/peerj.19094)
Supplement: Supplemental Information 2 — Includes variables such as patient demographics, poisoning incidents, treatment outcomes, and geographic distribution. [file peerj-13-19094-s002.xlsx]

## Sheet: Sheet1
Age in years	Death date	Gender	Age Group	Saudi	NATIONALITY	region	Sector	Diagnosis	Class	Outcome	Weight (kg)	Place of incidence	If other	Date of Exposure	Date of Sign and Symptoms	Arrival to Hospital Condition	Type of Poisoning	Substance Name	Chemical Type	If other_1	Route of Exposure	Sign and Symptoms	Hospital Sample No	Hospital : Blood Sample	Hospital : Urine Sample	Hospital : Gastric Sample	Toxicological Center Sample No	Toxicological : Blood Sample	Toxicological : Urine Sample	Sample of Poisoning Substance	Antidote Used	Management	Discharge from Hospital
10		MALE	6-12	SAUDI	Saudi Arabia	AlQrayat Region	AlQrayat General Hospital	Chemical Poisoning	Confirmed	Recovered	35	home		30/01/2019	30/01/2019	stable	Chemical	Kerosene	Fuel		Oral			Yes	Yes							No Admission to Hospital	stable
1		FEMALE	1-5	SAUDI	Saudi Arabia	Northern Borders Region	NA	Chemical Poisoning	Confirmed	Recovered				25/07/2019	25/07/2019		Chemical	Kerosene	Fuel		Oral
1		MALE	1-5	SAUDI	Saudi Arabia	AlQrayat Region	AlQrayat General Hospital	Chemical Poisoning	Confirmed	Recovered		home		05/11/2019	05/11/2019	stable	Chemical	Kerosene	Fuel		Oral											Admission to Hospital	stable
4		MALE	1-5	SAUDI	Saudi Arabia	AlQrayat Region	AlQrayat General Hospital	Chemical Poisoning	Confirmed	Recovered	7	home		10/01/2019	10/01/2019	Stable	Chemical	Kerosene	Fuel		Oral	Abdominal, Waekness		No
2		FEMALE	1-5	SAUDI	Saudi Arabia	AlQrayat Region	AlQrayat General Hospital	Chemical Poisoning	Confirmed	Recovered	12	home		24/03/2019	24/03/2019	stable	Chemical	Kerosene	Fuel		Oral											No Admission to Hospital	stable
2		MALE	1-5	SAUDI	Saudi Arabia	Northern Borders Region	NA	Chemical Poisoning	Confirmed	Recovered	12	home		02/06/2019	30/06/2019		Chemical	Kerosene	Fuel		Oral
1		MALE	1-5	NON-SAUDI	Yemen	Jeddah Region	NA	Chemical Poisoning	Confirmed	Recovered	10.3	home		14/10/2019	14/10/2019	stable	Chemical	Kerosene	Fuel		Oral	Difficulty, Dizziness, Nausea, Waekness		No	No	No		No	No	No		Admission to Hospital	stable
2		MALE	1-5	SAUDI	Saudi Arabia	Northern Borders Region	NA	Chemical Poisoning	Confirmed	Recovered	12	home		21/03/2019	21/03/2019		Chemical	Kerosene	Fuel		Oral
46		MALE	>39	SAUDI	Saudi Arabia	AlQrayat Region	AlQrayat General Hospital	Chemical Poisoning	Confirmed	Recovered		home		18/06/2019	18/06/2019	stable	Chemical	Kerosene	Fuel		Oral											No Admission to Hospital	stable
0		FEMALE	<1	SAUDI	Saudi Arabia	AlQrayat Region	AlQrayat General Hospital	Chemical Poisoning	Confirmed					25/11/2019	25/11/2019	stable	Chemical	Kerosene	Fuel													DAMA	stable
1		MALE	1-5	SAUDI	Saudi Arabia	AlQrayat Region	AlQrayat General Hospital	Chemical Poisoning	Confirmed	Recovered		home		26/01/2019	30/01/2019	stable	Chemical	Kerosene	Fuel		Oral											No Admission to Hospital	stable
1		FEMALE	1-5	SAUDI	Saudi Arabia	Northern Borders Region	NA	Chemical Poisoning	Confirmed	Recovered	9	home		17/02/2019	17/02/2019		Chemical	Kerosene	Fuel		Oral
1		FEMALE	1-5	SAUDI	Saudi Arabia	Northern Borders Region	NA	Chemical Poisoning	Confirmed	Recovered		home		31/07/2019	01/08/2019		Chemical	Kerosene	Fuel		Oral
2		FEMALE	1-5	SAUDI	Saudi Arabia	AlQrayat Region	AlQrayat General Hospital	Chemical Poisoning	Confirmed	Recovered				28/10/2019	28/10/2019		Chemical	Kerosene	Fuel
1		MALE	1-5	SAUDI	Saudi Arabia	AlQrayat Region	AlQrayat General Hospital	Chemical Poisoning	Confirmed	Recovered		home		10/03/2019	10/03/2019	stable	Chemical	Kerosene	Fuel		Oral											Admission to Hospital	stable
12		MALE	6-12	SAUDI	Saudi Arabia	Hail Region	NA	Chemical Poisoning	Confirmed	Recovered	40	home		14/04/2019	14/04/2019	stable	Chemical	Kerosene	Fuel		Oral	Fever		Yes	No	No		No	No	No		Admission to Hospital	stable
2		MALE	1-5	SAUDI	Saudi Arabia	AlTaif Region	NA	Chemical Poisoning	Confirmed			home		28/11/2019	27/11/2019	stable	Chemical	Kerosene	Fuel		Oral			Yes				Yes				DAMA	stable
1		FEMALE	1-5	SAUDI	Saudi Arabia	AlQrayat Region	AlQrayat General Hospital	Chemical Poisoning	Confirmed	Recovered				18/12/2019	18/12/2019	stable	Chemical	Kerosene	Fuel													No Admission to Hospital	stable
2		FEMALE	1-5	SAUDI	Saudi Arabia	AlQrayat Region	AlQrayat General Hospital	Chemical Poisoning	Confirmed	Recovered	11	home		29/01/2019	29/01/2019	critical	Chemical	Kerosene	Fuel		Oral	Nausea		Yes	Yes							Admission to Hospital	stable
1		FEMALE	1-5	SAUDI	Saudi Arabia	AlQrayat Region	AlQrayat General Hospital	Chemical Poisoning	Confirmed	Recovered		home		05/02/2019	05/02/2019	stable	Chemical	Kerosene	Fuel		Oral											No Admission to Hospital	stable
3		MALE	1-5	SAUDI	Saudi Arabia	AlTaif Region	NA	Chemical Poisoning	Confirmed			home		18/03/2019	18/03/2019	stable	Chemical	Kerosene	Fuel		Oral	Others		Yes				Yes				Admission to Hospital	stable
1		MALE	1-5	SAUDI	Saudi Arabia	Northern Borders Region	Maternity and Children Hospital in Northern Borders	Chemical Poisoning	Confirmed	Recovered		home		06/10/2019	06/10/2019		Chemical	Kerosene	Fuel		Oral	Nausea
3		MALE	1-5	SAUDI	Saudi Arabia	AlQrayat Region	AlQrayat General Hospital	Chemical Poisoning	Confirmed	Recovered		home		01/01/2019	01/01/2019	Stable	Chemical	Kerosene	Fuel		Oral	Abdominal									Activated	No Admission to Hospital
3		MALE	1-5	SAUDI	Saudi Arabia	AlQrayat Region	AlQrayat General Hospital	Chemical Poisoning	Confirmed	Recovered	9	home		15/01/2019	15/01/2019		Chemical	Kerosene	Fuel		Oral			No	Yes
2		MALE	1-5	SAUDI	Saudi Arabia	Northern Borders Region	NA	Chemical Poisoning	Confirmed	Recovered	12	home		03/02/2019	03/02/2019	stable	Chemical	Kerosene	Fuel		Oral	Abdominal		Yes		No		Yes	No	No		Admission to Hospital	stable
3		MALE	1-5	SAUDI	Saudi Arabia	AlQrayat Region	AlQrayat General Hospital	Chemical Poisoning	Confirmed	Recovered	18	home		03/03/2019	03/03/2019	stable	Chemical	Kerosene	Fuel		Oral											No Admission to Hospital	stable
2		MALE	1-5	SAUDI	Saudi Arabia	AlQrayat Region	AlQrayat General Hospital	Chemical Poisoning	Confirmed	Recovered		home		17/03/2019	17/03/2019	stable	Chemical	Kerosene	Fuel		Oral			Yes								No Admission to Hospital	stable
4		MALE	1-5	SAUDI	Saudi Arabia	Northern Borders Region	NA	Chemical Poisoning	Confirmed	Recovered	16	home		27/03/2019	28/03/2019		Chemical	Kerosene	Fuel		Oral	Vomiting
1		FEMALE	1-5	SAUDI	Saudi Arabia	AlQrayat Region	AlQrayat General Hospital	Chemical Poisoning	Confirmed	Recovered		home		21/11/2019	21/11/2019	stable	Chemical	Kerosene	Fuel		Oral											No Admission to Hospital	stable
1		MALE	1-5	SAUDI	Saudi Arabia	AlQrayat Region	AlQrayat General Hospital	Chemical Poisoning	Confirmed	Recovered				15/12/2019	15/12/2019	stable	Chemical	Kerosene	Fuel													No Admission to Hospital	stable
3		MALE	1-5	SAUDI	Saudi Arabia	Northern Borders Region	NA	Chemical Poisoning	Confirmed	Recovered	20			23/03/2019	23/03/2019		Chemical	Kerosene	Fuel		Oral
2		MALE	1-5	SAUDI	Saudi Arabia	AlQrayat Region	AlQrayat General Hospital	Chemical Poisoning	Confirmed	Recovered				25/11/2019	25/11/2019	stable	Chemical	Kerosene	Fuel		Oral											Admission to Hospital	stable
1		FEMALE	1-5	SAUDI	Saudi Arabia	Hafer AlBatin Region	South of Abu Musa Sector	Chemical Poisoning	Confirmed	Recovered	12.8	home		14/03/2019	14/03/2019	stable	Chemical	Kerosene	Fuel		Oral	Vomiting		No	No	No		No	No	No	Activated	Admission to Hospital	stable
2		MALE	1-5	SAUDI	Saudi Arabia	AlQrayat Region	AlQrayat General Hospital	Chemical Poisoning	Confirmed	Recovered	10	home		17/03/2019	17/03/2019	stable	Chemical	Kerosene	Fuel		Oral											No Admission to Hospital	stable
1		FEMALE	1-5	SAUDI	Saudi Arabia	AlQrayat Region	AlQrayat General Hospital	Chemical Poisoning	Confirmed	Recovered	12	home		31/03/2019	31/03/2019	stable	Chemical	Kerosene	Fuel		Oral											Admission to Hospital	stable
1		FEMALE	1-5	SAUDI	Saudi Arabia	Northern Borders Region	NA	Chemical Poisoning	Confirmed	Recovered	11	home		28/11/2019	28/11/2019	stable	Chemical	Kerosene	Fuel		Oral	Vomiting										Admission to Hospital	stable
4		MALE	1-5	SAUDI	Saudi Arabia	Hail Region	NA	Chemical Poisoning	Confirmed	Recovered		home		20/01/2019	20/01/2019	Stable	Chemical	Kerosene	Fuel		Oral	Vomiting		Yes	No	No		No	No	No		Admission to Hospital
1		MALE	1-5	SAUDI	Saudi Arabia	Hail Region	NA	Chemical Poisoning	Confirmed	Recovered		home		25/01/2019	25/01/2019	stable	Chemical	Kerosene	Fuel		Oral	Nausea		Yes	No	No		No	No	No		DAMA	stable
2		MALE	1-5	SAUDI	Saudi Arabia	AlQrayat Region	AlQrayat General Hospital	Chemical Poisoning	Confirmed	Recovered		home		24/03/2019	24/03/2019	stable	Chemical	Kerosene	Fuel		Oral											No Admission to Hospital	stable
2		MALE	1-5	SAUDI	Saudi Arabia	AlQrayat Region	AlQrayat General Hospital	Chemical Poisoning	Confirmed	Recovered				11/11/2019	11/11/2019	stable	Chemical	Kerosene	Fuel		Oral										Activated	Admission to Hospital	stable
2		MALE	1-5	SAUDI	Saudi Arabia	Northern Borders Region	Maternity and Children Hospital in Northern Borders	Chemical Poisoning	Confirmed	Recovered	14	home		15/12/2019	15/12/2019	stable	Chemical	Kerosene	Fuel		Oral	Vomiting		Yes								Admission to Hospital	stable
2		MALE	1-5	SAUDI	Saudi Arabia	Northern Borders Region	NA	Chemical Poisoning	Confirmed	Recovered	14	home		08/02/2019	10/02/2019		Chemical	Kerosene	Fuel		Oral
5		MALE	1-5	SAUDI	Saudi Arabia	Hail Region	AlShenan Sector	Chemical Poisoning	Suspect	Recovered		home		12/03/2019	12/03/2019	stable	Chemical	Kerosene	Fuel		Oral	Others		Yes							Activated	DAMA	stable
1		MALE	1-5	SAUDI	Saudi Arabia	Jeddah Region	NA	Chemical Poisoning	Confirmed	Recovered	10	home		06/04/2019	06/04/2019	stable	Chemical	Kerosene	Fuel		Oral	Difficulty		No	No	No		No	No	No		No Admission to Hospital	stable
2		FEMALE	1-5	SAUDI	Saudi Arabia	AlQrayat Region	AlQrayat General Hospital	Chemical Poisoning	Confirmed	Recovered		home		14/04/2019	14/04/2019	stable	Chemical	Kerosene	Fuel		Oral											No Admission to Hospital	stable
2		MALE	1-5	SAUDI	Saudi Arabia	Hafer AlBatin Region	South of Abu Musa Sector	Chemical Poisoning	Confirmed	Recovered	11	home		05/03/2019	05/03/2019	stable	Chemical	Kerosene	Fuel		Oral	Vomiting		Yes	No	No		No	No	No	Activated	Admission to Hospital	stable
2		FEMALE	1-5	SAUDI	Saudi Arabia	Northern Borders Region	NA	Chemical Poisoning	Confirmed	Recovered		home		01/06/2019	01/06/2019		Chemical	Kerosene	Fuel		Oral
3		MALE	1-5	SAUDI	Saudi Arabia	AlQrayat Region	AlQrayat General Hospital	Chemical Poisoning	Confirmed	Recovered		home		22/01/2019		stable	Chemical	Kerosene	Fuel		Oral			Yes	Yes
1		MALE	1-5	SAUDI	Saudi Arabia	Jazan Region	NA	Chemical Poisoning	Suspect			home		22/01/2019	22/01/2019	stable	Chemical	Kerosene	Fuel		Oral		alaydabi G H	Yes	No	No						No Admission to Hospital	stable
4		FEMALE	1-5	SAUDI	Saudi Arabia	AlQrayat Region	AlQrayat General Hospital	Chemical Poisoning	Confirmed	Recovered	13	home		11/02/2019	11/02/2019	stable	Chemical	Kerosene	Fuel		Oral			Yes								DAMA	stable
2		MALE	1-5	SAUDI	Saudi Arabia	AlQrayat Region	AlQrayat General Hospital	Chemical Poisoning	Confirmed	Recovered	16	home		03/03/2019	03/03/2019	stable	Chemical	Kerosene	Fuel		Oral	Vomiting										No Admission to Hospital	stable
2		FEMALE	1-5	SAUDI	Saudi Arabia	AlQrayat Region	AlQrayat General Hospital	Chemical Poisoning	Confirmed	Recovered		home		07/04/2019	07/04/2019	stable	Chemical	Kerosene	Fuel		Oral											No Admission to Hospital	stable
1		MALE	1-5	SAUDI	Saudi Arabia	AlQrayat Region	AlQrayat General Hospital	Chemical Poisoning	Confirmed	Recovered				10/10/2019	10/10/2019		Chemical	Kerosene	Fuel
2		MALE	1-5	SAUDI	Saudi Arabia	AlQrayat Region	AlQrayat General Hospital	Chemical Poisoning	Confirmed	Recovered	12	home		12/03/2019	12/03/2019	stable	Chemical	Kerosene	Fuel		Oral											No Admission to Hospital	stable
0		MALE	<1	SAUDI	Saudi Arabia	AlQrayat Region	AlQrayat General Hospital	Chemical Poisoning	Confirmed		9	home		04/04/2019	04/04/2019	stable	Chemical	Kerosene	Fuel		Oral											No Admission to Hospital	stable
2		FEMALE	1-5	SAUDI	Saudi Arabia	Northern Borders Region	Arar Sector	Chemical Poisoning	Confirmed	Recovered with Complications		home		08/04/2019	08/04/2019	stable	Chemical	Kerosene	Fuel		Oral			Yes	No	No		Yes	No	No		Admission to Hospital	stable
2		FEMALE	1-5	SAUDI	Saudi Arabia	AlQrayat Region	AlQrayat General Hospital	Chemical Poisoning	Confirmed	Recovered		home		05/05/2019	05/05/2019	stable	Chemical	Kerosene	Fuel		Oral											Admission to Hospital	stable
2		FEMALE	1-5	SAUDI	Saudi Arabia	AlQrayat Region	AlQrayat General Hospital	Chemical Poisoning	Confirmed	Recovered				24/10/2019	24/10/2019	stable	Chemical	Kerosene	Fuel													DAMA	stable
3		MALE	1-5	SAUDI	Saudi Arabia	AlQrayat Region	AlQrayat General Hospital	Chemical Poisoning	Confirmed	Recovered				13/11/2019	13/11/2019	stable	Chemical	Kerosene	Fuel		Oral											Admission to Hospital	stable
2		FEMALE	1-5	SAUDI	Saudi Arabia	AlQrayat Region	AlQrayat General Hospital	Chemical Poisoning	Confirmed	Recovered	10	home		22/01/2019		stable	Chemical	Kerosene	Fuel		Oral			Yes
2		MALE	1-5	SAUDI	Saudi Arabia	AlQrayat Region	AlQrayat General Hospital	Drug Overdosage Poisoning	Confirmed	Recovered		home		10/03/2019	10/03/2019	stable	Chemical	Kerosene	Fuel		Oral											Admission to Hospital	stable
3		MALE	1-5	SAUDI	Saudi Arabia	AlQrayat Region	AlQrayat General Hospital	Chemical Poisoning	Confirmed		19	home		17/03/2019	17/03/2019	stable	Chemical	Kerosene	Fuel		Oral											No Admission to Hospital	stable
1		MALE	1-5	SAUDI	Saudi Arabia	AlQrayat Region	AlQrayat General Hospital	Chemical Poisoning	Confirmed	Recovered		home		07/04/2019	07/04/2019	stable	Chemical	Kerosene	Fuel		Oral											DAMA	stable
2		MALE	1-5	SAUDI	Saudi Arabia	Hafer AlBatin Region	South of Abu Musa Sector	Chemical Poisoning	Confirmed	Recovered	11.7	home		09/01/2019	09/01/2019	stable	Chemical	Kerosene	Fuel		Oral	Vomiting		No	No	No		Yes	No	No	Activated	Admission to Hospital	stable
1		FEMALE	1-5	SAUDI	Saudi Arabia	AlQrayat Region	AlQrayat General Hospital	Chemical Poisoning	Confirmed	Recovered				29/09/2019	29/09/2019		Chemical	Kerosene	Fuel
1		FEMALE	1-5	SAUDI	Saudi Arabia	AlQrayat Region	AlQrayat General Hospital	Chemical Poisoning	Confirmed	Recovered	5	home		02/02/2019	04/02/2019	stable	Chemical	Kerosene	Fuel		Oral			Yes	Yes							Admission to Hospital	stable
2		FEMALE	1-5	SAUDI	Saudi Arabia	AlQrayat Region	AlQrayat General Hospital	Chemical Poisoning	Confirmed	Recovered		home		05/05/2019	05/05/2019	stable	Chemical	Kerosene	Fuel		Oral											No Admission to Hospital	stable
2		FEMALE	1-5	SAUDI	Saudi Arabia	AlQrayat Region	AlQrayat General Hospital	Chemical Poisoning	Confirmed	Recovered		home		17/11/2019	17/11/2019	stable	Chemical	Kerosene	Fuel													No Admission to Hospital	stable
1		FEMALE	1-5	SAUDI	Saudi Arabia	AlQrayat Region	AlQrayat General Hospital	Chemical Poisoning	Confirmed	Recovered				17/12/2019	17/12/2019	stable	Chemical	Kerosene	Fuel													No Admission to Hospital	stable
2		MALE	1-5	SAUDI	Saudi Arabia	Riyadh Region	AlHammadi Hospital AlNuzha	Chemical Poisoning	Confirmed			farm		03/01/2019	03/01/2019	Stable	Chemical	Kerosene	Fuel			Vomiting
2		MALE	1-5	SAUDI	Saudi Arabia	Northern Borders Region	NA	Chemical Poisoning	Confirmed	Recovered	19.2	home		10/04/2019	11/04/2019	stable	Chemical	Kerosene	Fuel		Oral			Yes	No	No		Yes	No	No		DAMA	stable
0		MALE	<1	SAUDI	Saudi Arabia	AlQrayat Region	AlQrayat General Hospital	Chemical Poisoning	Confirmed	Recovered		home		14/04/2019	14/04/2019	stable	Chemical	Kerosene	Fuel		Oral											No Admission to Hospital	stable
1		MALE	1-5	SAUDI	Saudi Arabia	Hail Region	NA	Chemical Poisoning	Confirmed	Recovered		home		12/01/2019	12/01/2019	Stable	Chemical	Kerosene	Fuel		Oral	Vomiting		Yes	Yes	Yes		Yes		Yes		Admission to Hospital
60		FEMALE	>39	SAUDI	Saudi Arabia	AlQrayat Region	AlQrayat General Hospital	Chemical Poisoning	Confirmed	Recovered		home		04/02/2019	04/02/2019	stable	Chemical	Kerosene	Fuel		Oral			Yes								No Admission to Hospital	stable
3		MALE	1-5	SAUDI	Saudi Arabia	AlQrayat Region	AlQrayat General Hospital	Chemical Poisoning	Confirmed	Recovered		home		05/02/2019	05/02/2019	stable	Chemical	Kerosene	Fuel		Oral											No Admission to Hospital	stable
1		MALE	1-5	SAUDI	Saudi Arabia	Hail Region	NA	Chemical Poisoning	Confirmed	Recovered		home		09/03/2019	09/03/2019	stable	Chemical	Kerosene	Fuel		Oral	Vomiting		Yes	No	No		No	No	No		Admission to Hospital	stable
1		MALE	1-5	SAUDI	Saudi Arabia	AlQrayat Region	AlQrayat General Hospital	Chemical Poisoning	Confirmed	Recovered	13	home		17/03/2019	17/03/2019	stable	Chemical	Kerosene	Fuel		Oral											No Admission to Hospital	stable
1		MALE	1-5	SAUDI	Saudi Arabia	Northern Borders Region	NA	Chemical Poisoning	Confirmed	Recovered	13	home		22/04/2019	23/04/2019		Chemical	Kerosene	Fuel		Oral
1		MALE	1-5	SAUDI	Saudi Arabia	Northern Borders Region	NA	Chemical Poisoning	Confirmed	Recovered		home		14/09/2019	15/09/2019		Chemical	Kerosene	Fuel		Oral	Nausea
3		FEMALE	1-5	SAUDI	Saudi Arabia	Northern Borders Region	NA	Chemical Poisoning	Confirmed	Recovered	14.6	home		18/12/2019	19/12/2019	stable	Chemical	Kerosene	Fuel		Oral	Nausea										No Admission to Hospital	stable
1		MALE	1-5	SAUDI	Saudi Arabia	Northern Borders Region	Maternity and Children Hospital in Northern Borders	Chemical Poisoning	Confirmed	Recovered	13	home		23/12/2019	23/12/2019	stable	Chemical	Kerosene	Fuel		Oral	Vomiting		Yes				Yes				Admission to Hospital	stable
45		MALE	>39	SAUDI	Saudi Arabia	AlQrayat Region	AlQrayat General Hospital	Chemical Poisoning	Confirmed	Recovered		home		17/03/2019	17/03/2019	stable	Chemical	Kerosene	Fuel		Oral											No Admission to Hospital	stable
0		FEMALE	<1	SAUDI	Saudi Arabia	Hail Region	AlShenan Sector	Chemical Poisoning	Confirmed	Recovered		home		12/03/2019	12/03/2019	stable	Chemical	Kerosene	Fuel		Oral	Vomiting		Yes							Activated	DAMA	stable
2		FEMALE	1-5	SAUDI	Saudi Arabia	AlQrayat Region	AlQrayat General Hospital	Chemical Poisoning	Confirmed			home		17/03/2019	17/03/2019	stable	Chemical	Kerosene	Fuel		Oral			Yes								Admission to Hospital	stable
0		MALE	<1	SAUDI	Saudi Arabia	Northern Borders Region	NA	Chemical Poisoning	Confirmed	Recovered		home		27/03/2019	27/03/2019		Chemical	Kerosene	Fuel		Oral	Vomiting
2		MALE	1-5	SAUDI	Saudi Arabia	AlQrayat Region	AlQrayat General Hospital	Chemical Poisoning	Confirmed	Recovered	13	home		04/04/2019	04/04/2019	stable	Chemical	Kerosene	Fuel		Oral											No Admission to Hospital	stable
3		MALE	1-5	SAUDI	Saudi Arabia	Asir Region	NA	Chemical Poisoning	Confirmed	Recovered	16.6	home		03/08/2019	03/08/2019	stable	Chemical	Kerosene	Fuel		Oral	Vomiting	122912	Yes	No	No	122912	No	No	No	Oxygen	Admission to Hospital	stable
1		MALE	1-5	SAUDI	Saudi Arabia	AlQrayat Region	AlQrayat General Hospital	Chemical Poisoning	Confirmed	Recovered				23/12/2019	23/12/2019	stable	Chemical	Kerosene	Fuel													DAMA	stable
3		FEMALE	1-5	SAUDI	Saudi Arabia	Northern Borders Region	NA	Chemical Poisoning	Confirmed	Recovered	12	home		05/01/2019	05/01/2019	Stable	Chemical	Kerosene	Fuel		Oral	Abdominal, Vomiting		No	Yes	Yes		Yes		Yes		Admission to Hospital
2		MALE	1-5	SAUDI	Saudi Arabia	Northern Borders Region	NA	Chemical Poisoning	Confirmed	Recovered	13	home		06/02/2019	10/02/2019		Chemical	Kerosene	Fuel		Oral
2		MALE	1-5	SAUDI	Saudi Arabia	Northern Borders Region	NA	Chemical Poisoning	Confirmed	Recovered	16	home		15/02/2019	17/02/2019	stable	Chemical	Kerosene	Fuel		Oral			Yes	No			No	No			Admission to Hospital	stable
3		MALE	1-5	SAUDI	Saudi Arabia	AlQrayat Region	AlQrayat General Hospital	Chemical Poisoning	Confirmed	Recovered		home		19/03/2019	19/03/2019	stable	Chemical	Kerosene	Fuel		Oral			Yes								No Admission to Hospital	stable
6		MALE	6-12	SAUDI	Saudi Arabia	AlQrayat Region	AlQrayat General Hospital	Chemical Poisoning	Confirmed	Recovered				24/03/2019	24/03/2019	stable	Chemical	Kerosene	Fuel		Oral											Admission to Hospital	stable
3		FEMALE	1-5	SAUDI	Saudi Arabia	AlQrayat Region	AlQrayat General Hospital	Chemical Poisoning	Confirmed	Recovered	13	home		28/01/2019	28/01/2019	stable	Chemical	Kerosene	Fuel		Oral			Yes	Yes								stable
1		FEMALE	1-5	SAUDI	Saudi Arabia	Hail Region	AlGhazalah Sector	Chemical Poisoning	Confirmed	Recovered	10	home		29/04/2019	29/04/2019	stable	Chemical	Kerosene	Fuel		Oral	Vomiting	3138	Yes	No	No	0	No	No	No		Admission to Hospital	stable
0		FEMALE	<1	SAUDI	Saudi Arabia	AlQrayat Region	AlQrayat General Hospital	Chemical Poisoning	Confirmed	Recovered				09/10/2019	09/10/2019		Chemical	Kerosene	Fuel
5		MALE	1-5	SAUDI	Saudi Arabia	AlQrayat Region	AlQrayat General Hospital	Chemical Poisoning	Confirmed	Recovered				28/10/2019	28/10/2019		Chemical	Kerosene	Fuel
5		FEMALE	1-5	SAUDI	Saudi Arabia	Hail Region	NA	Chemical Poisoning	Confirmed	Recovered		home		20/11/2019	20/11/2019	stable	Chemical	Kerosene	Fuel		Oral	Nausea, Vomiting		No	No	No		No	No	No		Admission to Hospital	stable
2		FEMALE	1-5	SAUDI	Saudi Arabia	AlQrayat Region	AlQrayat General Hospital	Chemical Poisoning	Confirmed	Recovered				28/11/2019	28/11/2019	stable	Chemical	Kerosene	Fuel		Oral											No Admission to Hospital	stable
1		MALE	1-5	SAUDI	Saudi Arabia	AlQrayat Region	AlQrayat General Hospital	Chemical Poisoning	Confirmed	Recovered				28/11/2019	28/11/2019	stable	Chemical	Kerosene	Fuel		Oral											Admission to Hospital	stable
4		FEMALE	1-5	SAUDI	Saudi Arabia	Northern Borders Region	NA	Chemical Poisoning	Confirmed	Recovered	11	farm		01/02/2019	03/02/2019	stable	Chemical	Kerosene	Fuel		Oral			Yes		No		Yes	No	No		Admission to Hospital	stable
3		MALE	1-5	NON-SAUDI	Syrian Arab Republic	Northern Borders Region	NA	Chemical Poisoning	Confirmed	Recovered		home		04/03/2019	04/03/2019		Chemical	Kerosene	Fuel		Oral	Difficulty
1		MALE	1-5	SAUDI	Saudi Arabia	AlQrayat Region	AlQrayat General Hospital	Chemical Poisoning	Confirmed	Recovered	15	home		17/03/2019	17/03/2019	stable	Chemical	Kerosene	Fuel													No Admission to Hospital	stable
4		MALE	1-5	SAUDI	Saudi Arabia	AlQrayat Region	AlQrayat General Hospital	Chemical Poisoning	Confirmed	Recovered				28/10/2019	28/10/2019		Chemical	Kerosene	Fuel		Oral
3		MALE	1-5	SAUDI	Saudi Arabia	Northern Borders Region	Maternity and Children Hospital in Northern Borders	Chemical Poisoning	Confirmed	Recovered	15	home		12/12/2019	12/12/2019	stable	Chemical	Kerosene	Fuel		Oral	Vomiting		Yes	Yes							Admission to Hospital	stable
1		MALE	1-5	SAUDI	Saudi Arabia	AlQrayat Region	AlQrayat General Hospital	Chemical Poisoning	Confirmed	Recovered	10	home		24/03/2019	24/03/2019	stable	Chemical	Kerosene	Fuel		Oral											No Admission to Hospital	stable
3		MALE	1-5	SAUDI	Saudi Arabia	AlQrayat Region	AlQrayat General Hospital	Chemical Poisoning	Confirmed	Recovered				26/11/2019	26/11/2019		Chemical	Kerosene	Fuel
2		FEMALE	1-5	SAUDI	Saudi Arabia	AlQrayat Region	AlQrayat General Hospital	Chemical Poisoning	Confirmed	Recovered	9	home		06/01/2019	06/01/2019	Stable	Chemical	Kerosene	Fuel		Oral	Abdominal, Diarrhea
3		MALE	1-5	SAUDI	Saudi Arabia	AlQrayat Region	AlQrayat General Hospital	Chemical Poisoning	Confirmed	Recovered		home		30/04/2019	30/04/2019	stable	Chemical	Kerosene	Fuel													Admission to Hospital	stable
4		MALE	1-5	SAUDI	Saudi Arabia	Hail Region	NA	Chemical Poisoning	Confirmed	Recovered		home		15/08/2019	15/08/2019	stable	Chemical	Kerosene	Fuel		Oral	Nausea		Yes	No	Yes		No	No		Atropine	Admission to Hospital	stable
5		MALE	1-5	SAUDI	Saudi Arabia	AlQrayat Region	AlQrayat General Hospital	Chemical Poisoning	Confirmed	Recovered				29/09/2019	29/09/2019		Chemical	Kerosene	Fuel
3		MALE	1-5	SAUDI	Saudi Arabia	Northern Borders Region	NA	Chemical Poisoning	Confirmed	Recovered	13	home		18/10/2019	20/10/2019		Chemical	Kerosene	Fuel		Oral
1		FEMALE	1-5	SAUDI	Saudi Arabia	Northern Borders Region	NA	Chemical Poisoning	Confirmed	Other	11	home		02/01/2019	02/01/2019	Stable	Chemical	Kerosene	Fuel		Oral			No				No
3		FEMALE	1-5	SAUDI	Saudi Arabia	AlQrayat Region	AlQrayat General Hospital	Chemical Poisoning	Confirmed	Recovered	10	home		13/01/2019	13/01/2019	Stable	Chemical	Kerosene	Fuel
4		MALE	1-5	SAUDI	Saudi Arabia	Northern Borders Region	NA	Chemical Poisoning	Confirmed	Recovered	16	home		05/02/2019	07/02/2019	stable	Chemical	Kerosene	Fuel		Oral			Yes	No			Yes	No			Admission to Hospital	stable
2		FEMALE	1-5	NON-SAUDI	Yemen	AlQassim Region	AlRass Sector	Chemical Poisoning	Confirmed	Recovered		home		10/02/2019	10/02/2019	stable	Chemical	Kerosene	Fuel		Oral	Vomiting	no									Admission to Hospital	stable
2		FEMALE	1-5	SAUDI	Saudi Arabia	Northern Borders Region	NA	Chemical Poisoning	Confirmed	Recovered	12	home		12/02/2019	13/02/2019		Chemical	Kerosene	Fuel		Oral
4		FEMALE	1-5	SAUDI	Saudi Arabia	AlQrayat Region	AlQrayat General Hospital	Chemical Poisoning	Confirmed	Recovered	20	school		17/03/2019	17/03/2019	stable	Chemical	Kerosene	Fuel													No Admission to Hospital	stable
1		FEMALE	1-5	SAUDI	Saudi Arabia	AlQrayat Region	AlQrayat General Hospital	Chemical Poisoning	Confirmed	Recovered	9	home		24/03/2019	24/03/2019	stable	Chemical	Kerosene	Fuel		Oral											No Admission to Hospital	stable
2		MALE	1-5	SAUDI	Saudi Arabia	Northern Borders Region	NA	Chemical Poisoning	Confirmed	Recovered	13	home		27/07/2019	28/07/2019		Chemical	Kerosene	Fuel		Oral
2		FEMALE	1-5	SAUDI	Saudi Arabia	AlQrayat Region	AlQrayat General Hospital	Chemical Poisoning	Confirmed			home		24/09/2019	24/09/2019	stable	Chemical	Kerosene	Fuel		Oral										Activated	Admission to Hospital	stable
1		FEMALE	1-5	SAUDI	Saudi Arabia	AlQrayat Region	AlQrayat General Hospital	Chemical Poisoning	Confirmed	Recovered	10	home		07/04/2019	07/04/2019		Chemical	Kerosene	Fuel		Oral
4		FEMALE	1-5	SAUDI	Saudi Arabia	AlQrayat Region	AlQrayat General Hospital	Chemical Poisoning	Confirmed	Recovered		home		07/04/2019	07/04/2019	stable	Chemical	Kerosene	Fuel													No Admission to Hospital	stable
2		FEMALE	1-5	SAUDI	Saudi Arabia	AlQrayat Region	AlQrayat General Hospital	Chemical Poisoning	Confirmed	Recovered		home		05/05/2019	05/05/2019	critical	Chemical	Kerosene	Fuel		Oral											Admission to Hospital
2		MALE	1-5	SAUDI	Saudi Arabia	Hail Region	NA	Chemical Poisoning	Confirmed	Recovered		home		04/11/2019	04/11/2019	stable	Chemical	Kerosene	Fuel		Oral	Vomiting		Yes	No	No		No	No	No	Activated	DAMA	stable
3		MALE	1-5	SAUDI	Saudi Arabia	AlQrayat Region	AlQrayat General Hospital	Chemical Poisoning	Confirmed	Recovered				15/12/2019	15/12/2019	stable	Chemical	Kerosene	Fuel													No Admission to Hospital	stable
5		MALE	1-5	SAUDI	Saudi Arabia	Hail Region	NA	Chemical Poisoning	Confirmed	Recovered		home		09/03/2019	08/03/2019	stable	Chemical	Kerosene	Fuel		Oral	Nausea		Yes	No	No		No	No	No		Absconded	stable
2		FEMALE	1-5	SAUDI	Saudi Arabia	AlMedina AlMonawarah Region	NA	Chemical Poisoning	Confirmed	Recovered		home		07/01/2019	07/01/2019	Stable	Chemical	Kerosene	Fuel		Oral	Difficulty, Vomiting		No	No	No					Others	Admission to Hospital
1		FEMALE	1-5	SAUDI	Saudi Arabia	AlQrayat Region	AlQrayat General Hospital	Chemical Poisoning	Confirmed	Recovered	9	home		11/02/2019	11/02/2019	stable	Chemical	Kerosene	Fuel		Oral	Vomiting		Yes	Yes							Admission to Hospital	stable
2		FEMALE	1-5	SAUDI	Saudi Arabia	Hail Region	NA	Chemical Poisoning	Confirmed	Other	7	home		28/11/2019	28/11/2019	stable	Chemical	Kerosene	Fuel		Oral	Difficulty		No	No	No		No	No	No	Others	Transfer to another Hospital	stable
2		FEMALE	1-5	SAUDI	Saudi Arabia	Northern Borders Region	NA	Chemical Poisoning	Confirmed	Recovered		home		01/12/2019	01/12/2019	stable	Chemical	Kerosene	Fuel		Oral	Nausea		Yes	No	Yes		Yes	No	No	Activated	Admission to Hospital	stable
1		FEMALE	1-5	SAUDI	Saudi Arabia	AlQrayat Region	AlQrayat General Hospital	Chemical Poisoning	Confirmed					21/01/2019			Chemical	Kerosene	Fuel		Oral			Yes
7		MALE	6-12	SAUDI	Saudi Arabia	Northern Borders Region	NA	Chemical Poisoning	Confirmed	Recovered	19	home		04/02/2019	04/02/2019	stable	Chemical	Kerosene	Fuel		Oral			Yes	No	No		Yes	No	No		Admission to Hospital	stable
4		MALE	1-5	SAUDI	Saudi Arabia	Northern Borders Region	NA	Chemical Poisoning	Confirmed	Recovered	11	home		10/02/2019	10/02/2019	stable	Chemical	Kerosene	Fuel		Oral			Yes	No	No		Yes	No	No		Admission to Hospital	stable
2		FEMALE	1-5	SAUDI	Saudi Arabia	Northern Borders Region	NA	Chemical Poisoning	Confirmed	Recovered	11	home		14/02/2019	14/02/2019		Chemical	Kerosene	Fuel		Oral	Vomiting
3		FEMALE	1-5	SAUDI	Saudi Arabia	AlQrayat Region	AlQrayat General Hospital	Chemical Poisoning	Confirmed	Recovered				11/11/2019	11/11/2019	critical	Chemical	Kerosene	Fuel		Oral										Activated	Admission to Hospital	stable
2		MALE	1-5	SAUDI	Saudi Arabia	Hail Region	NA	Chemical Poisoning	Confirmed	Recovered		home		17/11/2019	17/11/2019	stable	Chemical	Kerosene	Fuel		Oral	Waekness		No	No	No		No	No			Admission to Hospital	stable
1		MALE	1-5	SAUDI	Saudi Arabia	AlQrayat Region	AlQrayat General Hospital	Chemical Poisoning	Confirmed					20/11/2019	20/11/2019	stable	Chemical	Kerosene	Fuel		Oral											No Admission to Hospital	stable
4		FEMALE	1-5	SAUDI	Saudi Arabia	Northern Borders Region	NA	Chemical Poisoning	Confirmed	Other	13	home		02/01/2019	02/01/2019	Stable	Chemical	Kerosene	Fuel		Oral	Vomiting
3		FEMALE	1-5	SAUDI	Saudi Arabia	AlQrayat Region	AlQrayat General Hospital	Chemical Poisoning	Confirmed	Recovered		home		19/02/2019	19/02/2019	stable	Chemical	Kerosene	Fuel		Oral			Yes								No Admission to Hospital	stable
2		MALE	1-5	SAUDI	Saudi Arabia	AlQrayat Region	AlQrayat General Hospital	Chemical Poisoning	Confirmed	Recovered				07/10/2019	07/10/2019		Chemical	Kerosene	Fuel
1		FEMALE	1-5	SAUDI	Saudi Arabia	AlQrayat Region	AlQrayat General Hospital	Chemical Poisoning	Confirmed	Recovered		home		05/03/2019	05/03/2019	stable	Chemical	Kerosene	Fuel		Oral			Yes	Yes							No Admission to Hospital	stable
1		MALE	1-5	SAUDI	Saudi Arabia	AlQrayat Region	AlQrayat General Hospital	Chemical Poisoning	Confirmed	Recovered				19/03/2019	19/03/2019	stable	Chemical	Kerosene	Fuel		Oral			Yes								No Admission to Hospital	stable
3		MALE	1-5	SAUDI	Saudi Arabia	AlQrayat Region	AlQrayat General Hospital	Chemical Poisoning	Confirmed	Recovered		home		31/03/2019	31/03/2019		Chemical	Kerosene	Fuel		Oral											No Admission to Hospital	stable
3		MALE	1-5	SAUDI	Saudi Arabia	AlQrayat Region	AlQrayat General Hospital	Chemical Poisoning	Confirmed	Recovered	11	home		11/02/2019	11/02/2019	stable	Chemical	Kerosene	Fuel		Oral	Vomiting		Yes								No Admission to Hospital	stable
2		FEMALE	1-5	SAUDI	Saudi Arabia	AlQrayat Region	AlQrayat General Hospital	Chemical Poisoning	Confirmed	Recovered	13	home		11/04/2019	11/04/2019	stable	Chemical	Kerosene	Fuel													No Admission to Hospital	stable
4		FEMALE	1-5	NON-SAUDI	Palestine	Eastern Region	AlKhobar Sector	Chemical Poisoning	Suspect		22	home		16/04/2019	16/04/2019	stable	Chemical	Kerosene	Fuel		Oral	Others	0	No	No	No	0	No	No	No		Admission to Hospital	stable
2		MALE	1-5	SAUDI	Saudi Arabia	AlQrayat Region	AlQrayat General Hospital	Chemical Poisoning	Confirmed	Recovered				30/10/2019	30/10/2019	stable	Chemical	Kerosene	Fuel													DAMA	stable
