# Supplementary material for: Epidemiology of kerosene poisoning in Saudi Arabia: a retrospective analysis
Source: PeerJ. 2025 Mar 19;13:e19094. doi: 10.7717/peerj.19094 (PMC11929502; doi:10.7717/peerj.19094)
Supplement: Supplemental Information 3 — Includes variables such as patient demographics, poisoning incidents, treatment outcomes, and geographic distribution. [file peerj-13-19094-s003.xlsx]

## Sheet: Sheet1
Age in years	Death date	Gender	Age Group	Saudi	NATIONALITY	region	Sector	Diagnosis	Class	Outcome	Weight (kg)	Place of incidence	If other	Date of Exposure	Date of Sign and Symptoms	Arrival to Hospital Condition	Type of Poisoning	Substance Name	Chemical Type	If other_1	Drug Name	Durg Type	If other_2	Physical form of Poisoning	Circumstances of Exposure	Route of Exposure	Sign and Symptoms	Hospital Sample No	Hospital : Blood Sample	Hospital : Urine Sample	Hospital : Gastric Sample	Toxicological Center Sample No	Toxicological : Blood Sample	Toxicological : Urine Sample	Sample of Poisoning Substance	Antidote Used	Management	Discharge from Hospital
5		FEMALE	1-5	SAUDI	Saudi Arabia	AlQrayat Region	AlQrayat General Hospital	Drug Overdosage Poisoning	Confirmed	Recovered		home		22/01/2020	22/01/2020	stable	Chemical	Kerosene	Fuel					Liquid	Unintentional	Oral											No Admission to Hospital	stable
2		MALE	1-5	SAUDI	Saudi Arabia	Northern Borders Region	Maternity and Children Hospital in Northern Borders	Chemical Poisoning	Confirmed	Recovered	14	home		09/03/2020	10/03/2020	stable	Chemical	Kerosene	Fuel					Liquid	Unintentional	Oral	Abdominal		Yes		No		Yes				Admission to Hospital	stable
5		MALE	1-5	NON-SAUDI	Syrian Arab Republic	Northern Borders Region	Maternity and Children Hospital in Northern Borders	Chemical Poisoning	Confirmed	Recovered	14	home		29/06/2020	29/06/2020	stable	Chemical	Kerosene	Fuel					Liquid	Unintentional	Oral	Abdominal			Yes			Yes				Admission to Hospital	stable
1		FEMALE	1-5	SAUDI	Saudi Arabia	AlQrayat Region	AlQrayat General Hospital	Chemical Poisoning	Confirmed	Recovered		home		03/03/2020	03/03/2020	stable	Chemical	Kerosene	Fuel					Liquid	Unintentional	Oral											Admission to Hospital	stable
2		MALE	1-5	SAUDI	Saudi Arabia	AlQrayat Region	AlQrayat General Hospital	Chemical Poisoning	Confirmed	Recovered		home		02/04/2020	02/04/2020	stable	Chemical	Kerosene	Fuel					Liquid	Unintentional	Oral										Activated	No Admission to Hospital	stable
2		FEMALE	1-5	SAUDI	Saudi Arabia	Hail Region	Bagaa General Hospital	Chemical Poisoning	Confirmed	DAMA	16	home		13/08/2020	13/08/2020	stable	Chemical	Kerosene	Fuel					Liquid	Unintentional	Oral	Nausea		No	No	No		Yes	No			DAMA	stable
2		MALE	1-5	SAUDI	Saudi Arabia	Northern Borders Region	Maternity and Children Hospital in Northern Borders	Chemical Poisoning	Confirmed	Recovered	13	home		15/01/2020	16/01/2020	stable	Chemical	Kerosene	Fuel					Liquid	Unintentional	Oral	Vomiting		Yes	Yes			Yes				No Admission to Hospital	stable
3		FEMALE	1-5	SAUDI	Saudi Arabia	Northern Borders Region	Maternity and Children Hospital in Northern Borders	Chemical Poisoning	Confirmed	Recovered	14	home		30/01/2020	02/02/2020	stable	Chemical	Kerosene	Fuel					Liquid	Unintentional	Oral	Vomiting		Yes				Yes				Admission to Hospital	stable
1		FEMALE	1-5	SAUDI	Saudi Arabia	AlQrayat Region	AlQrayat General Hospital	Chemical Poisoning	Confirmed	Recovered		home		16/04/2020	16/04/2020	stable	Chemical	Kerosene	Fuel					Liquid	Occupational	Oral											No Admission to Hospital	stable
3		MALE	1-5	SAUDI	Saudi Arabia	AlQrayat Region	AlQrayat General Hospital	Chemical Poisoning	Confirmed	Recovered		home		11/08/2020	11/08/2020	stable	Chemical	Kerosene	Fuel					Liquid	Unintentional	Oral										Activated	No Admission to Hospital	stable
3		FEMALE	1-5	SAUDI	Saudi Arabia	AlQrayat Region	AlQrayat General Hospital	Chemical Poisoning	Confirmed			home		09/12/2020	09/12/2020	stable	Chemical	Kerosene	Fuel					Liquid	Unintentional	Oral										Activated	Admission to Hospital	stable
2		MALE	1-5	SAUDI	Saudi Arabia	AlJouf Region	NA	Chemical Poisoning	Confirmed			other	المنزل	05/10/2020	05/10/2020	stable	Chemical	Kerosene	Fuel					Liquid	Unintentional	Oral											Admission to Hospital	stable
2		MALE	1-5	SAUDI	Saudi Arabia	AlQrayat Region	AlQrayat General Hospital	Chemical Poisoning	Confirmed			home		16/03/2021	16/03/2021	stable	Chemical	Kerosene	Fuel						Occupational	Oral											No Admission to Hospital	stable
1		MALE	1-5	SAUDI	Saudi Arabia	AlQrayat Region	AlQrayat General Hospital	Chemical Poisoning	Confirmed	Recovered		home		14/01/2020	14/01/2020	stable	Chemical	Kerosene	Fuel					Liquid	Unintentional	Oral										Activated	Admission to Hospital	stable
1		MALE	1-5	SAUDI	Saudi Arabia	Hail Region	AlShenan Sector	Chemical Poisoning	Confirmed	DAMA		home		02/02/2020	02/02/2020	stable	Chemical	Kerosene	Fuel					Liquid	Unintentional	Oral	Others		Yes	No	No		No	No	No	Oxygen	DAMA	stable
1		FEMALE	1-5	SAUDI	Saudi Arabia	AlQrayat Region	AlQrayat General Hospital	Chemical Poisoning	Confirmed	Recovered		home		09/03/2020	09/03/2020	stable	Chemical	Kerosene	Fuel					Liquid	Unknown	Oral											Admission to Hospital	stable
2		FEMALE	1-5	SAUDI	Saudi Arabia	Hafer AlBatin Region	NA	Chemical Poisoning	Confirmed	Recovered	10.2	home		28/03/2020	28/03/2020	stable	Chemical	Kerosene	Fuel					Liquid	Unintentional	Oral	Vomiting		No	No	No		No	No	No	Activated	Admission to Hospital	stable
1		FEMALE	1-5	SAUDI	Saudi Arabia	AlQrayat Region	AlQrayat General Hospital	Chemical Poisoning	Confirmed	Recovered		home		12/04/2020	12/04/2020	stable	Chemical	Kerosene	Fuel					Liquid	Occupational	Inhalation											DAMA	stable
0		MALE	<1	SAUDI	Saudi Arabia	AlQrayat Region	AlQrayat General Hospital	Chemical Poisoning	Confirmed	Recovered		home		24/05/2020	24/05/2020	stable	Chemical	Kerosene	Fuel					Liquid	Occupational	Oral											No Admission to Hospital	stable
1		MALE	1-5	SAUDI	Saudi Arabia	AlQrayat Region	AlQrayat General Hospital	Chemical Poisoning	Confirmed	Recovered		home		25/10/2020	25/10/2020	stable	Chemical	Kerosene	Fuel					Liquid	Unintentional	Oral										Activated	No Admission to Hospital	stable
0		MALE	<1	SAUDI	Saudi Arabia	Hafer AlBatin Region	NA	Chemical Poisoning	Confirmed	Recovered	15	home		08/12/2020	08/12/2020	stable	Chemical	Kerosene	Fuel					Liquid	Unintentional	Oral	Others		No	No	No		Yes	No	No	Activated	Admission to Hospital	stable
2		MALE	1-5	SAUDI	Saudi Arabia	Hail Region	NA	Chemical Poisoning	Confirmed	Recovered		home		05/02/2020	05/02/2020	stable	Chemical	Kerosene	Fuel					Liquid	Intentional	Oral	Dizziness		Yes	No	No		Yes	No	No	Activated	Admission to Hospital	stable
2		MALE	1-5	SAUDI	Saudi Arabia	Northern Borders Region	Maternity and Children Hospital in Northern Borders	Chemical Poisoning	Confirmed	Recovered	14	home		12/04/2020	10/04/2020	stable	Chemical	Kerosene	Fuel					Liquid	Unintentional	Oral	Nausea			Yes			Yes				Admission to Hospital	stable
1		MALE	1-5	SAUDI	Saudi Arabia	AlQrayat Region	AlQrayat General Hospital	Chemical Poisoning	Confirmed	Recovered		other		21/06/2020	21/06/2020		Chemical	Kerosene	Fuel					Liquid	Occupational	Oral
24		MALE	20-39	SAUDI	Saudi Arabia	AlQrayat Region	AlQrayat General Hospital	Drug Overdosage Poisoning	Confirmed	Recovered		home		09/08/2020	09/08/2020	stable	Chemical	Kerosene	Fuel					Liquid	Unintentional	Oral										Activated	DAMA
1		FEMALE	1-5	SAUDI	Saudi Arabia	AlQrayat Region	AlQrayat General Hospital	Chemical Poisoning	Confirmed	Recovered		home		06/09/2020	06/09/2020	stable	Chemical	Kerosene	Fuel					Liquid	Unintentional	Oral										Activated	DAMA	stable
2		FEMALE	1-5	SAUDI	Saudi Arabia	AlQrayat Region	AlQrayat General Hospital	Chemical Poisoning	Confirmed	Recovered		home		19/01/2020	19/01/2020	stable	Chemical	Kerosene	Fuel					Liquid	Unintentional	Oral										Activated	No Admission to Hospital	stable
2		FEMALE	1-5	SAUDI	Saudi Arabia	AlQrayat Region	AlQrayat General Hospital	Chemical Poisoning	Confirmed	Recovered		home		16/02/2020	16/02/2020	stable	Chemical	Kerosene	Fuel					Liquid	Unintentional	Oral										Others	DAMA	stable
3		MALE	1-5	SAUDI	Saudi Arabia	AlQrayat Region	AlQrayat General Hospital	Chemical Poisoning	Confirmed			home		23/02/2020	23/02/2020	stable	Chemical	Kerosene	Fuel					Solid	Unintentional	Oral										Activated	Admission to Hospital	stable
3		FEMALE	1-5	SAUDI	Saudi Arabia	AlQrayat Region	AlQrayat General Hospital	Chemical Poisoning	Confirmed	Recovered				01/03/2020	01/03/2020	stable	Chemical	Kerosene	Fuel																		DAMA	stable
2		MALE	1-5	SAUDI	Saudi Arabia	AlQrayat Region	AlQrayat General Hospital	Chemical Poisoning	Confirmed	Recovered		home		10/06/2020	10/06/2020	stable	Chemical	Kerosene	Fuel					Liquid	Occupational	Oral											Admission to Hospital	stable
1		MALE	1-5	SAUDI	Saudi Arabia	AlQrayat Region	AlQrayat General Hospital	Chemical Poisoning	Confirmed	Recovered		home		10/06/2020	10/06/2020	stable	Chemical	Kerosene	Fuel					Liquid	Occupational	Oral											Admission to Hospital
2		FEMALE	1-5	SAUDI	Saudi Arabia	Hail Region	NA	Chemical Poisoning	Confirmed	Recovered		home		29/08/2020	29/08/2020	stable	Chemical	Kerosene	Fuel					Liquid	Unintentional	Oral	Difficulty		No	No	No		Yes	No	No	Activated	Admission to Hospital	stable
1		FEMALE	1-5	SAUDI	Saudi Arabia	AlJouf Region	NA	Chemical Poisoning	Confirmed			other	المنزل	28/03/2020	28/03/2020	stable	Chemical	Kerosene	Fuel					Liquid	Unintentional	Oral											Admission to Hospital	stable
6		FEMALE	6-12	SAUDI	Saudi Arabia	AlQrayat Region	AlQrayat General Hospital	Drug Overdosage Poisoning	Confirmed	Recovered		home		17/03/2021	17/03/2021	stable	Chemical	Kerosene	Fuel					Liquid	Unintentional	Oral										Activated	No Admission to Hospital
1		MALE	1-5	SAUDI	Saudi Arabia	AlQrayat Region	AlQrayat General Hospital	Chemical Poisoning	Confirmed	Recovered		home		26/01/2020	26/01/2020	stable	Chemical	Kerosene	Fuel					Liquid	Unintentional	Oral											No Admission to Hospital	stable
3		FEMALE	1-5	SAUDI	Saudi Arabia	Northern Borders Region	Maternity and Children Hospital in Northern Borders	Chemical Poisoning	Confirmed	Recovered	10	home		09/03/2020	11/03/2020	stable	Chemical	Kerosene	Fuel					Liquid	Unintentional	Oral	Abdominal		Yes				Yes				Admission to Hospital	stable
1		MALE	1-5	SAUDI	Saudi Arabia	AlQrayat Region	AlQrayat General Hospital	Chemical Poisoning	Confirmed	Recovered		home		05/04/2020	05/04/2020	stable	Chemical	Kerosene	Fuel					Liquid	Unintentional	Oral											No Admission to Hospital	stable
1		FEMALE	1-5	SAUDI	Saudi Arabia	AlQrayat Region	AlQrayat General Hospital	Chemical Poisoning	Confirmed	Recovered		home		12/04/2020	12/04/2020	stable	Chemical	Kerosene	Fuel					Liquid	Unintentional	Oral											No Admission to Hospital	stable
4		MALE	1-5	SAUDI	Saudi Arabia	Riyadh Region	National Guard King Abdulaziz Medical City in Riyadh	Chemical Poisoning	Confirmed			home		19/04/2020	19/04/2020	stable	Chemical	Kerosene	Fuel					Liquid	Unintentional	Oral	Vomiting										No Admission to Hospital	stable
0		FEMALE	<1	SAUDI	Saudi Arabia	AlQrayat Region	AlQrayat General Hospital	Chemical Poisoning	Confirmed	Recovered		home		10/06/2020	10/06/2020	stable	Chemical	Kerosene	Fuel					Liquid	Occupational	Oral											No Admission to Hospital	stable
2		MALE	1-5	SAUDI	Saudi Arabia	AlQrayat Region	AlQrayat General Hospital	Chemical Poisoning	Confirmed	Recovered		home		14/06/2020	14/06/2020	stable	Chemical	Kerosene	Fuel					Liquid	Occupational	Oral											DAMA	stable
2		MALE	1-5	SAUDI	Saudi Arabia	AlJouf Region	NA	Chemical Poisoning	Confirmed			other	المنزل	09/04/2020	09/04/2020	stable	Chemical	Kerosene	Fuel					Liquid	Unintentional	Oral							Yes				Admission to Hospital	stable
2		MALE	1-5	SAUDI	Saudi Arabia	AlQrayat Region	AlQrayat General Hospital	Chemical Poisoning	Confirmed	Recovered		home		20/10/2020	20/10/2020	stable	Chemical	Kerosene	Fuel						Unintentional	Oral										Activated	No Admission to Hospital	stable
2		MALE	1-5	SAUDI	Saudi Arabia	Northern Borders Region	Maternity and Children Hospital in Northern Borders	Chemical Poisoning	Confirmed	Recovered		home		15/12/2020	16/12/2020	stable	Chemical	Kerosene	Fuel					Liquid	Unintentional	Oral	Vomiting			Yes			Yes				Admission to Hospital	stable
2		MALE	1-5	SAUDI	Saudi Arabia	Hail Region	NA	Chemical Poisoning	Confirmed	Recovered		home		31/12/2020	31/12/2020	stable	Chemical	Kerosene	Fuel					Liquid	Unintentional	Oral	Nausea		No	No	No		No	No	No		DAMA	stable
1		MALE	1-5	SAUDI	Saudi Arabia	Northern Borders Region	Maternity and Children Hospital in Northern Borders	Chemical Poisoning	Confirmed	Recovered		home		14/11/2020	15/11/2020	stable	Chemical	Kerosene	Fuel					Liquid	Unintentional	Oral	Vomiting		Yes				Yes				Admission to Hospital	stable
7		FEMALE	6-12	SAUDI	Saudi Arabia	AlQrayat Region	AlQrayat General Hospital	Chemical Poisoning	Confirmed			home		01/12/2020	01/12/2020	stable	Chemical	Kerosene	Fuel					Liquid	Unintentional	Oral							Yes	Yes		Activated	No Admission to Hospital	stable
31		MALE	20-39	SAUDI	Saudi Arabia	AlQrayat Region	AlQrayat General Hospital	Chemical Poisoning	Confirmed			home		04/03/2020	04/03/2020	stable	Chemical	Kerosene	Fuel					Liquid	Unintentional	Oral											DAMA	stable
1		FEMALE	1-5	NON-SAUDI	Egypt	AlQrayat Region	AlQrayat General Hospital	Chemical Poisoning	Confirmed	Recovered		home		15/03/2020	15/03/2020	stable	Chemical	Kerosene	Fuel					Liquid	Occupational	Oral										Activated	DAMA	stable
1		FEMALE	1-5	SAUDI	Saudi Arabia	AlQrayat Region	AlQrayat General Hospital	Chemical Poisoning	Confirmed	Recovered		home		23/04/2020	23/04/2020	stable	Chemical	Kerosene	Fuel					Liquid	Unintentional	Oral										Activated	Admission to Hospital	stable
3		FEMALE	1-5	SAUDI	Saudi Arabia	Asir Region	NA	Chemical Poisoning	Suspect		19	home		28/11/2020	28/11/2020	stable	Chemical	Kerosene	Fuel					Liquid	Unknown	Oral	Others	69764	Yes	Yes		69764	Yes	Yes			Admission to Hospital	stable
2		MALE	1-5	SAUDI	Saudi Arabia	AlQrayat Region	AlQrayat General Hospital	Drug Overdosage Poisoning	Confirmed			home		16/03/2021	16/03/2021	stable	Chemical	Kerosene	Fuel						Occupational	Oral											No Admission to Hospital	stable
2		FEMALE	1-5	SAUDI	Saudi Arabia	AlQrayat Region	AlQrayat General Hospital	Chemical Poisoning	Confirmed	Recovered		home		06/01/2020	06/01/2020	stable	Chemical	Kerosene	Fuel					Liquid	Unintentional	Oral										Activated	No Admission to Hospital	stable
2		MALE	1-5	SAUDI	Saudi Arabia	Northern Borders Region	Maternity and Children Hospital in Northern Borders	Chemical Poisoning	Confirmed	Recovered	14	home		25/01/2020	26/01/2020	stable	Chemical	Kerosene	Fuel					Liquid	Unintentional	Oral	Nausea		Yes				Yes				Admission to Hospital	stable
2		MALE	1-5	SAUDI	Saudi Arabia	AlQrayat Region	AlQrayat General Hospital	Chemical Poisoning	Confirmed	Recovered		home		15/03/2020	15/03/2020	stable	Chemical	Kerosene	Fuel					Liquid	Occupational	Oral										Activated	Admission to Hospital	stable
2		MALE	1-5	SAUDI	Saudi Arabia	Northern Borders Region	Maternity and Children Hospital in Northern Borders	Chemical Poisoning	Confirmed	Recovered	15	home		03/05/2020	04/05/2020	stable	Chemical	Kerosene	Fuel					Liquid	Unintentional	Oral	Vomiting			Yes			Yes				Admission to Hospital	stable
4		MALE	1-5	NON-SAUDI	Sudan	Northern Borders Region	Maternity and Children Hospital in Northern Borders	Chemical Poisoning	Confirmed	Recovered		home		09/06/2020	09/06/2020	stable	Chemical	Kerosene	Fuel					Liquid	Unintentional	Oral	Vomiting			Yes			Yes				Admission to Hospital	stable
2		MALE	1-5	SAUDI	Saudi Arabia	Northern Borders Region	Maternity and Children Hospital in Northern Borders	Chemical Poisoning	Confirmed	Recovered	15	home		18/10/2020	18/10/2020	stable	Chemical	Kerosene	Fuel					Liquid	Unintentional	Oral	Nausea			Yes			Yes				Admission to Hospital	stable
2		FEMALE	1-5	SAUDI	Saudi Arabia	AlJouf Region	NA	Chemical Poisoning	Confirmed			other	المنزل	03/04/2020	03/04/2020	stable	Chemical	Kerosene	Fuel					Liquid	Unintentional	Oral											Admission to Hospital	stable
1		MALE	1-5	SAUDI	Saudi Arabia	Hail Region	AlGhazalah Sector	Chemical Poisoning	Confirmed	Recovered	9	home		26/12/2020	26/12/2020	stable	Chemical	Kerosene	Fuel					Liquid	Unintentional	Oral	Others	120000007671	No	No	No				No		DAMA	stable
7		MALE	6-12	SAUDI	Saudi Arabia	AlQrayat Region	AlQrayat General Hospital	Chemical Poisoning	Confirmed	Recovered		home		20/04/2020	20/04/2020	stable	Chemical	Kerosene	Fuel					Liquid	Occupational	Oral											Admission to Hospital	stable
4		FEMALE	1-5	SAUDI	Saudi Arabia	AlQrayat Region	AlQrayat General Hospital	Chemical Poisoning	Confirmed			home		13/05/2020	13/05/2020	stable	Chemical	Kerosene	Fuel					Liquid	Occupational	Oral											Admission to Hospital	stable
4		MALE	1-5	SAUDI	Saudi Arabia	AlQrayat Region	AlQrayat General Hospital	Chemical Poisoning	Confirmed	Recovered		home		05/07/2020	05/07/2020	stable	Chemical	Kerosene	Fuel					Liquid	Unintentional	Oral										Activated	Admission to Hospital	stable
1		MALE	1-5	NON-SAUDI	Jordan	AlQrayat Region	AlQrayat General Hospital	Chemical Poisoning	Confirmed	Recovered		home		16/08/2020	16/08/2020	stable	Chemical	Kerosene	Fuel					Liquid	Unintentional	Oral										Activated	Admission to Hospital	stable
2		MALE	1-5	SAUDI	Saudi Arabia	AlJouf Region	NA	Chemical Poisoning	Confirmed			other	المنزل	08/04/2020	08/04/2020	stable	Chemical	Kerosene	Fuel					Liquid	Unintentional	Oral											Admission to Hospital	stable
1		FEMALE	1-5	SAUDI	Saudi Arabia	AlQrayat Region	AlQrayat General Hospital	Drug Overdosage Poisoning	Confirmed	Recovered		home		23/02/2020	23/02/2020	stable	Chemical	Kerosene	Fuel					Liquid	Unintentional	Oral											Admission to Hospital	stable
1		FEMALE	1-5	SAUDI	Saudi Arabia	Eastern Region	AlJubail sector	Chemical Poisoning	Confirmed		13	home		25/02/2020	25/02/2020	stable	Chemical	Kerosene	Fuel					Liquid	Unintentional	Oral	Others		No	No	No		No	No		Others	DAMA	stable
5		MALE	1-5	SAUDI	Saudi Arabia	AlQrayat Region	AlQrayat General Hospital	Chemical Poisoning	Confirmed	Recovered		home		05/04/2020	05/04/2020	stable	Chemical	Kerosene	Fuel					Liquid	Unintentional	Oral										Activated	No Admission to Hospital	stable
1		MALE	1-5	SAUDI	Saudi Arabia	AlQrayat Region	AlQrayat General Hospital	Chemical Poisoning	Confirmed	Recovered		home		09/08/2020	09/08/2020	stable	Chemical	Kerosene	Fuel					Liquid	Unintentional	Oral										Activated	Admission to Hospital	stable
1		MALE	1-5	SAUDI	Saudi Arabia	Northern Borders Region	Maternity and Children Hospital in Northern Borders	Chemical Poisoning	Confirmed	Recovered	8	home		05/12/2020	06/12/2020	stable	Chemical	Kerosene	Fuel					Liquid	Unintentional	Oral	Others			Yes			Yes				Admission to Hospital	stable
1		FEMALE	1-5	SAUDI	Saudi Arabia	AlJouf Region	NA	Chemical Poisoning	Confirmed			home		18/12/2020	18/12/2020	stable	Chemical	Kerosene	Fuel					Liquid		Oral	Nausea		No	No	No		Yes	No	No		Admission to Hospital	stable
1		MALE	1-5	SAUDI	Saudi Arabia	AlJouf Region	NA	Chemical Poisoning	Confirmed			other	المنزل	23/06/2020	23/06/2020	stable	Chemical	Kerosene	Fuel					Liquid	Unintentional	Oral											Admission to Hospital	stable
3		MALE	1-5	SAUDI	Saudi Arabia	AlJouf Region	NA	Chemical Poisoning	Confirmed	Recovered		other	المنزل	26/12/2020	26/12/2020	stable	Chemical	Kerosene	Fuel					Liquid	Unintentional	Oral			No	No	No		Yes	No	No		Admission to Hospital	stable
3		FEMALE	1-5	SAUDI	Saudi Arabia	Northern Borders Region	Maternity and Children Hospital in Northern Borders	Chemical Poisoning	Confirmed	Recovered	12	home		30/12/2020	30/12/2020	stable	Chemical	Kerosene	Fuel					Liquid	Unintentional	Oral	Vomiting			Yes			Yes				Admission to Hospital	stable
2		FEMALE	1-5	SAUDI	Saudi Arabia	AlQrayat Region	AlQrayat General Hospital	Chemical Poisoning	Confirmed	Recovered		home		09/02/2020	09/02/2020	stable	Chemical	Kerosene	Fuel					Liquid	Unintentional	Oral										Activated	Admission to Hospital	stable
1		MALE	1-5	SAUDI	Saudi Arabia	AlQrayat Region	AlQrayat General Hospital	Chemical Poisoning	Confirmed	Recovered		home		15/03/2020	15/03/2020	stable	Chemical	Kerosene	Fuel					Liquid	Unintentional	Oral										Activated	No Admission to Hospital	stable
2		FEMALE	1-5	SAUDI	Saudi Arabia	Northern Borders Region	NA	Chemical Poisoning	Confirmed	Recovered	10	home		20/12/2020	20/12/2020	stable	Chemical	Kerosene	Fuel					Liquid	Unintentional	Oral							Yes				Admission to Hospital	stable
1		MALE	1-5	SAUDI	Saudi Arabia	AlJouf Region	NA	Chemical Poisoning	Confirmed			other	المنزل	24/03/2020	24/03/2020	stable	Chemical	Kerosene	Fuel					Liquid	Unintentional	Oral											Admission to Hospital	stable
2		MALE	1-5	SAUDI	Saudi Arabia	AlQrayat Region	AlQrayat General Hospital	Chemical Poisoning	Confirmed	Recovered		home		10/05/2020	10/05/2020	stable	Chemical	Kerosene	Fuel					Liquid	Occupational	Oral											No Admission to Hospital	stable
3		MALE	1-5	SAUDI	Saudi Arabia	AlQrayat Region	AlQrayat General Hospital	Chemical Poisoning	Confirmed	Recovered		home		05/07/2020	05/07/2020	stable	Chemical	Kerosene	Fuel					Solid	Unintentional	Oral										Activated	DAMA
4		MALE	1-5	SAUDI	Saudi Arabia	Hail Region	AlGhazalah Sector	Chemical Poisoning	Confirmed	DAMA	16	home		27/08/2020	27/08/2020	stable	Chemical	Kerosene	Fuel					Liquid	Unintentional	Oral	Vomiting	5014	No	No	No	0	Yes	No	No	Others	DAMA	stable
14		MALE	13-19	SAUDI	Saudi Arabia	AlTaif Region	NA	Chemical Poisoning	Confirmed			home		28/10/2020	28/10/2020	stable	Chemical	Kerosene	Fuel					Liquid	Unintentional	Oral			No	Yes	No		Yes	No	Yes	Activated	DAMA	stable
3		MALE	1-5	SAUDI	Saudi Arabia	AlQrayat Region	AlQrayat General Hospital	Chemical Poisoning	Confirmed	Recovered		home		13/01/2020	13/01/2020	stable	Chemical	Kerosene	Fuel					Liquid	Unintentional	Oral										Activated	No Admission to Hospital	stable
1		MALE	1-5	SAUDI	Saudi Arabia	AlQrayat Region	AlQrayat General Hospital	Chemical Poisoning	Confirmed	Recovered		home		15/01/2020	15/01/2020	stable	Chemical	Kerosene	Fuel					Liquid	Unintentional	Oral										Activated	DAMA	stable
2		MALE	1-5	SAUDI	Saudi Arabia	AlQrayat Region	AlQrayat General Hospital	Chemical Poisoning	Confirmed	Recovered		home		06/02/2020	06/02/2020	stable	Chemical	Kerosene	Fuel					Liquid	Unintentional	Oral											No Admission to Hospital	stable
2		MALE	1-5	SAUDI	Saudi Arabia	AlQrayat Region	AlQrayat General Hospital	Chemical Poisoning	Confirmed	Recovered		home		25/03/2020	25/03/2020	stable	Chemical	Kerosene	Fuel					Liquid	Occupational	Oral											No Admission to Hospital	stable
2		MALE	1-5	SAUDI	Saudi Arabia	AlQrayat Region	AlQrayat General Hospital	Chemical Poisoning	Confirmed	Recovered		home		05/04/2020	05/04/2020	stable	Chemical	Kerosene	Fuel					Liquid	Unintentional	Oral										Activated	No Admission to Hospital	stable
1		MALE	1-5	SAUDI	Saudi Arabia	AlQrayat Region	AlQrayat General Hospital	Chemical Poisoning	Confirmed	Recovered		home		12/04/2020	12/04/2020	stable	Chemical	Kerosene	Fuel					Liquid	Occupational	Oral											DAMA	stable
2		MALE	1-5	SAUDI	Saudi Arabia	AlQrayat Region	AlQrayat General Hospital	Chemical Poisoning	Confirmed	Recovered		home		17/06/2020	17/06/2020	stable	Chemical	Kerosene	Fuel					Liquid	Occupational	Oral											DAMA	stable
1		FEMALE	1-5	SAUDI	Saudi Arabia	AlQrayat Region	AlQrayat General Hospital	Chemical Poisoning	Confirmed	Recovered		home		10/08/2020	10/08/2020	stable	Chemical	Kerosene	Fuel					Liquid	Unintentional	Oral										Activated	No Admission to Hospital	stable
3		MALE	1-5	SAUDI	Saudi Arabia	AlQrayat Region	AlQrayat General Hospital	Chemical Poisoning	Confirmed	Recovered		home		14/01/2020	14/01/2020	stable	Chemical	Kerosene	Fuel					Liquid	Unintentional	Oral										Activated	No Admission to Hospital	stable
1		FEMALE	1-5	SAUDI	Saudi Arabia	AlQrayat Region	AlQrayat General Hospital	Chemical Poisoning	Confirmed	Recovered		home		25/10/2020	25/10/2020	stable	Chemical	Kerosene	Fuel					Liquid	Unintentional	Oral										Activated	No Admission to Hospital	stable
2		MALE	1-5	SAUDI	Saudi Arabia	AlJouf Region	NA	Chemical Poisoning	Confirmed			other	المنزل	31/03/2020	20/12/2020	stable	Chemical	Kerosene	Fuel					Liquid	Unintentional	Oral											Admission to Hospital	stable
2		MALE	1-5	SAUDI	Saudi Arabia	AlJouf Region	NA	Chemical Poisoning	Confirmed			home		07/07/2020	07/07/2020	stable	Chemical	Kerosene	Fuel					Liquid	Unintentional	Oral			No	No	No		No	No	No		Admission to Hospital	stable
2		MALE	1-5	SAUDI	Saudi Arabia	AlQrayat Region	AlQrayat General Hospital	Chemical Poisoning	Confirmed	Recovered		home		05/04/2020	05/04/2020	stable	Chemical	Kerosene	Fuel					Liquid	Occupational	Oral											Admission to Hospital	stable
1		MALE	1-5	SAUDI	Saudi Arabia	AlQrayat Region	AlQrayat General Hospital	Chemical Poisoning	Confirmed	Recovered		home		11/05/2020	11/05/2020	stable	Chemical	Kerosene	Fuel					Liquid	Occupational	Oral											No Admission to Hospital	stable
2		FEMALE	1-5	SAUDI	Saudi Arabia	AlQrayat Region	AlQrayat General Hospital	Chemical Poisoning	Confirmed	Recovered		home		13/05/2020	13/05/2020	stable	Chemical	Kerosene	Fuel							Oral											No Admission to Hospital	stable
0		FEMALE	<1	SAUDI	Saudi Arabia	Asir Region	NA	Chemical Poisoning	Confirmed	Recovered	6.9	home		30/09/2020	30/09/2020	stable	Chemical	Kerosene	Fuel					Gas	Unintentional	Inhalation	Vomiting		No	No	No		Yes	No	No		DAMA	stable
2		MALE	1-5	SAUDI	Saudi Arabia	AlQrayat Region	AlQrayat General Hospital	Chemical Poisoning	Confirmed	Recovered				30/11/2020	30/11/2020		Chemical	Kerosene	Fuel							Oral
48		FEMALE	>39	SAUDI	Saudi Arabia	AlQrayat Region	AlQrayat General Hospital	Chemical Poisoning	Confirmed	Recovered		home		12/08/2020	12/08/2020	stable	Chemical	Kerosene	Fuel					Liquid	Unintentional	Oral										Activated	No Admission to Hospital	stable
3		MALE	1-5	SAUDI	Saudi Arabia	Northern Borders Region	Maternity and Children Hospital in Northern Borders	Chemical Poisoning	Confirmed	Recovered	19	home		11/01/2020	12/01/2020	stable	Chemical	Kerosene	Fuel					Liquid	Unintentional	Oral	Vomiting		Yes				Yes				Admission to Hospital	stable
1		FEMALE	1-5	SAUDI	Saudi Arabia	AlQrayat Region	AlQrayat General Hospital	Chemical Poisoning	Confirmed	Recovered		home		01/04/2020	01/04/2020	stable	Chemical	Kerosene	Fuel					Liquid	Unintentional	Oral										Activated	No Admission to Hospital	stable
1		FEMALE	1-5	SAUDI	Saudi Arabia	AlQrayat Region	AlQrayat General Hospital	Chemical Poisoning	Confirmed	Recovered				26/04/2020	26/04/2020	stable	Chemical	Kerosene	Fuel																		No Admission to Hospital	stable
2		MALE	1-5	SAUDI	Saudi Arabia	AlQrayat Region	AlQrayat General Hospital	Chemical Poisoning	Confirmed	Recovered		home		21/05/2020	21/05/2020	stable	Chemical	Kerosene	Fuel					Liquid	Occupational	Oral											No Admission to Hospital	stable
1		MALE	1-5	SAUDI	Saudi Arabia	AlQrayat Region	AlQrayat General Hospital	Chemical Poisoning	Confirmed	Recovered		home		16/08/2020	16/08/2020	stable	Chemical	Kerosene	Fuel					Liquid	Unintentional	Oral										Activated	DAMA	stable
1		FEMALE	1-5	SAUDI	Saudi Arabia	AlQrayat Region	AlQrayat General Hospital	Chemical Poisoning	Confirmed	Recovered		home		25/10/2020	25/10/2020	stable	Chemical	Kerosene	Fuel					Liquid	Unintentional	Oral										Activated	No Admission to Hospital	stable
2		FEMALE	1-5	SAUDI	Saudi Arabia	AlQrayat Region	AlQrayat General Hospital	Chemical Poisoning	Confirmed	Recovered		home		16/02/2020	16/02/2020	stable	Chemical	Kerosene	Fuel					Liquid	Unintentional	Oral											Admission to Hospital	stable
2		FEMALE	1-5	SAUDI	Saudi Arabia	AlJouf Region	NA	Chemical Poisoning	Confirmed	Recovered		other	المنزل	02/03/2020	02/03/2016	stable	Chemical	Kerosene	Fuel					Liquid	Unintentional	Oral											Admission to Hospital	stable
2		MALE	1-5	SAUDI	Saudi Arabia	AlJouf Region	NA	Chemical Poisoning	Confirmed			other	المنزل	24/11/2020	24/11/2020	stable	Chemical	Kerosene	Fuel					Liquid	Unintentional	Oral											Admission to Hospital	stable
3		FEMALE	1-5	SAUDI	Saudi Arabia	Northern Borders Region	Maternity and Children Hospital in Northern Borders	Chemical Poisoning	Confirmed	Recovered	14	home		05/01/2020	06/01/2020	stable	Chemical	Kerosene	Fuel					Liquid	Unintentional	Oral	Vomiting		Yes				Yes				Admission to Hospital	stable
1		MALE	1-5	SAUDI	Saudi Arabia	AlQrayat Region	AlQrayat General Hospital	Chemical Poisoning	Confirmed	Recovered		home		02/02/2020	02/02/2020	stable	Chemical	Kerosene	Fuel					Liquid	Unintentional	Oral										Activated	Admission to Hospital	stable
1		FEMALE	1-5	SAUDI	Saudi Arabia	AlQrayat Region	AlQrayat General Hospital	Chemical Poisoning	Confirmed	Recovered		home		03/06/2020	03/06/2020	stable	Chemical	Kerosene	Fuel					Liquid	Occupational	Inhalation											No Admission to Hospital	stable
31		MALE	20-39	SAUDI	Saudi Arabia	AlQrayat Region	AlQrayat General Hospital	Chemical Poisoning	Confirmed	Recovered		home		09/04/2020	09/04/2020	stable	Chemical	Kerosene	Fuel					Liquid	Occupational	Oral											No Admission to Hospital	stable
2		FEMALE	1-5	SAUDI	Saudi Arabia	AlQrayat Region	AlQrayat General Hospital	Chemical Poisoning	Confirmed	Recovered		home		23/02/2020	23/02/2020	stable	Chemical	Kerosene	Fuel					Liquid	Unintentional	Oral											Admission to Hospital	stable
1		MALE	1-5	SAUDI	Saudi Arabia	AlQrayat Region	AlQrayat General Hospital	Chemical Poisoning	Confirmed	Recovered		home		19/05/2020	19/05/2020	stable	Chemical	Kerosene	Fuel					Liquid	Occupational	Oral											No Admission to Hospital	stable
2		MALE	1-5	SAUDI	Saudi Arabia	Hail Region	NA	Chemical Poisoning	Confirmed	Recovered		home		07/12/2020	07/12/2020	stable	Chemical	Kerosene	Fuel					Liquid	Unintentional	Oral	Fever, Headache, Waekness		No	No	No		No	No	No		Admission to Hospital	stable
1		MALE	1-5	SAUDI	Saudi Arabia	AlQrayat Region	AlQrayat General Hospital	Chemical Poisoning	Confirmed	Recovered		home		13/01/2020	13/01/2020	stable	Chemical	Kerosene	Fuel					Liquid	Unintentional	Oral										Activated	No Admission to Hospital	stable
1		MALE	1-5	SAUDI	Saudi Arabia	AlQrayat Region	AlQrayat General Hospital	Chemical Poisoning	Confirmed	Recovered		home		13/02/2020	13/02/2020	stable	Chemical	Kerosene	Fuel					Liquid	Unintentional	Oral											No Admission to Hospital	stable
2		MALE	1-5	SAUDI	Saudi Arabia	AlQrayat Region	AlQrayat General Hospital	Chemical Poisoning	Confirmed	Recovered		home		22/04/2020	22/04/2020	stable	Chemical	Kerosene	Fuel					Liquid	Occupational	Oral											DAMA	stable
6		MALE	6-12	SAUDI	Saudi Arabia	AlQrayat Region	AlQrayat General Hospital	Chemical Poisoning	Confirmed	Recovered		home		05/05/2020	05/05/2020	stable	Chemical	Kerosene	Fuel					Liquid	Occupational	Dermal											No Admission to Hospital	stable
2		MALE	1-5	SAUDI	Saudi Arabia	AlQrayat Region	AlQrayat General Hospital	Chemical Poisoning	Confirmed	Recovered		home		05/05/2020	05/05/2020	stable	Chemical	Kerosene	Fuel					Liquid	Occupational	Oral											No Admission to Hospital	stable
1		MALE	1-5	SAUDI	Saudi Arabia	AlQrayat Region	AlQrayat General Hospital	Chemical Poisoning	Confirmed	Recovered		home		05/05/2020	05/05/2020	stable	Chemical	Kerosene	Fuel					Liquid	Unintentional	Oral										Activated	No Admission to Hospital	stable
3		FEMALE	1-5	SAUDI	Saudi Arabia	Northern Borders Region	NA	Chemical Poisoning	Confirmed	Recovered		home		20/12/2020	20/12/2020	stable	Chemical	Kerosene	Fuel					Liquid	Unintentional	Oral							Yes				Admission to Hospital	stable
1		MALE	1-5	SAUDI	Saudi Arabia	Northern Borders Region	Maternity and Children Hospital in Northern Borders	Chemical Poisoning	Confirmed	Recovered	13	home		09/01/2020	12/01/2020	stable	Chemical	Kerosene	Fuel					Liquid	Unintentional	Oral	Vomiting		Yes				Yes				Admission to Hospital	stable
0		FEMALE	<1	SAUDI	Saudi Arabia	AlQrayat Region	AlQrayat General Hospital	Chemical Poisoning	Confirmed	Recovered		home		09/02/2020	09/02/2020	stable	Chemical	Kerosene	Fuel					Liquid	Unintentional	Oral											Admission to Hospital	stable
5		MALE	1-5	SAUDI	Saudi Arabia	Najran Region	NA	Chemical Poisoning	Confirmed			other	Outside AL Bar	22/02/2020	22/02/2020	stable	Chemical	Kerosene	Fuel					Liquid			Others										No Admission to Hospital	stable
2		FEMALE	1-5	SAUDI	Saudi Arabia	AlQrayat Region	AlQrayat General Hospital	Chemical Poisoning	Confirmed	Recovered		home		21/04/2020	21/04/2020	stable	Chemical	Kerosene	Fuel					Liquid	Unintentional	Oral										Activated	No Admission to Hospital	stable
2		MALE	1-5	SAUDI	Saudi Arabia	AlQrayat Region	AlQrayat General Hospital	Chemical Poisoning	Confirmed	Recovered		home		22/04/2020	22/04/2020	stable	Chemical	Kerosene	Fuel					Liquid	Unintentional	Oral										Activated	DAMA	stable
3		FEMALE	1-5	SAUDI	Saudi Arabia	AlJouf Region	NA	Chemical Poisoning	Confirmed			other	المنزل	28/03/2020	28/03/2020	stable	Chemical	Kerosene	Fuel					Liquid	Unintentional	Oral											Admission to Hospital	stable
9		FEMALE	6-12	SAUDI	Saudi Arabia	AlQrayat Region	AlQrayat General Hospital	Chemical Poisoning	Confirmed	Recovered		home		15/01/2020	15/01/2020	stable	Chemical	Kerosene	Fuel					Liquid	Unintentional	Oral										Activated	DAMA	stable
3		MALE	1-5	SAUDI	Saudi Arabia	AlQrayat Region	AlQrayat General Hospital	Chemical Poisoning	Confirmed	Recovered		home		20/04/2020	20/04/2020	stable	Chemical	Kerosene	Fuel					Liquid	Occupational	Oral											No Admission to Hospital	stable
1		MALE	1-5	SAUDI	Saudi Arabia	Riyadh Region	Riyadh First Health Sector 1 Cluster	Chemical Poisoning	Confirmed		11	home		04/08/2020	04/08/2020	stable	Chemical	Kerosene	Fuel					Liquid	Unintentional	Oral	Difficulty						Yes				Admission to Hospital
2		FEMALE	1-5	SAUDI	Saudi Arabia	AlQrayat Region	AlQrayat General Hospital	Chemical Poisoning	Confirmed	Recovered		home		15/11/2020	15/11/2020	stable	Chemical	Kerosene	Fuel					Liquid	Unintentional	Oral										Activated	No Admission to Hospital	stable
2		FEMALE	1-5	SAUDI	Saudi Arabia	Hail Region	NA	Chemical Poisoning	Confirmed	Recovered		home		18/12/2020	18/12/2020	stable	Chemical	Kerosene	Fuel					Liquid	Unintentional	Oral	Nausea, Vomiting		No	No	No		Yes	No	No		DAMA	stable
4		FEMALE	1-5	SAUDI	Saudi Arabia	AlQrayat Region	AlQrayat General Hospital	Chemical Poisoning	Confirmed			home		16/03/2021	16/03/2021	stable	Chemical	Kerosene	Fuel					Liquid	Unintentional	Oral										Activated	No Admission to Hospital	stable
3		FEMALE	1-5	SAUDI	Saudi Arabia	Northern Borders Region	Maternity and Children Hospital in Northern Borders	Chemical Poisoning	Confirmed	Recovered	11	home		15/02/2020	16/02/2020	stable	Chemical	Kerosene	Fuel					Liquid	Unintentional	Oral	Abdominal		Yes				Yes				Admission to Hospital	stable
1		MALE	1-5	SAUDI	Saudi Arabia	AlQrayat Region	AlQrayat General Hospital	Chemical Poisoning	Confirmed	Recovered		home		07/05/2020	07/05/2020	stable	Chemical	Kerosene	Fuel					Liquid	Occupational	Oral											Admission to Hospital	stable
1		MALE	1-5	SAUDI	Saudi Arabia	AlQrayat Region	AlQrayat General Hospital	Chemical Poisoning	Confirmed	Recovered		home		05/07/2020	05/07/2020	stable	Chemical	Kerosene	Fuel					Liquid	Unintentional	Oral										Activated	DAMA
1		FEMALE	1-5	SAUDI	Saudi Arabia	Hail Region	NA	Chemical Poisoning	Confirmed	Recovered		home		05/08/2020	05/08/2020	stable	Chemical	Kerosene	Fuel					Liquid	Unintentional	Oral	Skin		No	No	No		Yes	No	No	Activated	DAMA	stable
2		MALE	1-5	SAUDI	Saudi Arabia	Northern Borders Region	Maternity and Children Hospital in Northern Borders	Chemical Poisoning	Confirmed	Recovered		home		11/12/2020	13/12/2020	stable	Chemical	Kerosene	Fuel					Liquid	Unintentional	Oral	Vomiting			Yes			Yes				Admission to Hospital	stable
1		MALE	1-5	SAUDI	Saudi Arabia	AlJouf Region	NA	Chemical Poisoning	Confirmed	Recovered		other	المنزل	01/01/2020	01/01/2020	stable	Chemical	Kerosene	Fuel					Liquid	Unintentional	Oral											Admission to Hospital	stable
2		FEMALE	1-5	SAUDI	Saudi Arabia	AlJouf Region	NA	Chemical Poisoning	Confirmed	Recovered		other	المنزل	04/01/2020	04/01/2020	stable	Chemical	Kerosene	Fuel					Liquid	Unintentional	Oral											Admission to Hospital	stable
1		FEMALE	1-5	SAUDI	Saudi Arabia	AlQrayat Region	AlQrayat General Hospital	Chemical Poisoning	Confirmed	Recovered		home		31/03/2020	31/03/2020	stable	Chemical	Kerosene	Fuel					Liquid	Unintentional	Oral										Activated	No Admission to Hospital	stable
8		FEMALE	6-12	SAUDI	Saudi Arabia	AlQrayat Region	AlQrayat General Hospital	Chemical Poisoning	Confirmed	Recovered		home		19/07/2020	19/07/2020	stable	Chemical	Kerosene	Fuel					Liquid	Unintentional	Oral											No Admission to Hospital	stable
2		MALE	1-5	SAUDI	Saudi Arabia	Northern Borders Region	NA	Chemical Poisoning	Confirmed	Recovered	11	home		16/11/2020	16/11/2020	stable	Chemical	Kerosene	Fuel					Liquid	Unintentional	Oral	Others						Yes				Admission to Hospital	stable
2		MALE	1-5	SAUDI	Saudi Arabia	AlJouf Region	NA	Chemical Poisoning	Suspect			other	المنزل	15/11/2020	15/11/2020	stable	Chemical	Kerosene	Fuel					Liquid	Unintentional	Oral											Admission to Hospital	stable
1		MALE	1-5	SAUDI	Saudi Arabia	AlJouf Region	NA	Chemical Poisoning	Confirmed			other	المنزل	19/03/2020	19/03/2020	stable	Chemical	Kerosene	Fuel					Liquid	Unintentional	Oral											Admission to Hospital	stable
1		MALE	1-5	SAUDI	Saudi Arabia	AlQrayat Region	AlQrayat General Hospital	Chemical Poisoning	Confirmed	Recovered		home		23/02/2020	23/02/2020	stable	Chemical	Kerosene	Fuel					Liquid	Unintentional	Oral											Admission to Hospital	stable
3		MALE	1-5	SAUDI	Saudi Arabia	AlQrayat Region	AlQrayat General Hospital	Chemical Poisoning	Confirmed	Recovered		home		07/04/2020	07/04/2020	stable	Chemical	Kerosene	Fuel					Liquid	Unintentional	Oral										Activated	No Admission to Hospital	stable
1		MALE	1-5	SAUDI	Saudi Arabia	Northern Borders Region	Maternity and Children Hospital in Northern Borders	Chemical Poisoning	Confirmed	Recovered	10	home		03/12/2020	06/12/2020	stable	Chemical	Kerosene	Fuel					Liquid	Unintentional	Oral	Vomiting			Yes			Yes				Admission to Hospital	stable
1		MALE	1-5	SAUDI	Saudi Arabia	AlQrayat Region	AlQrayat General Hospital	Chemical Poisoning	Confirmed	Recovered		home		26/07/2020	26/07/2020	stable	Chemical	Kerosene	Fuel					Liquid	Unintentional	Oral										Activated	No Admission to Hospital
3		FEMALE	1-5	SAUDI	Saudi Arabia	AlQrayat Region	AlQrayat General Hospital	Chemical Poisoning	Confirmed	Recovered		home		19/01/2020	19/01/2020	stable	Chemical	Kerosene	Fuel					Liquid	Unintentional	Oral											Admission to Hospital	stable
1		MALE	1-5	SAUDI	Saudi Arabia	AlQrayat Region	AlQrayat General Hospital	Drug Overdosage Poisoning	Confirmed	Recovered		home		22/01/2020	22/01/2020	stable	Chemical	Kerosene	Fuel					Liquid	Unintentional	Oral											No Admission to Hospital	stable
2		MALE	1-5	SAUDI	Saudi Arabia	Hail Region	NA	Chemical Poisoning	Confirmed	Recovered		home		04/02/2020	04/02/2020	stable	Chemical	Kerosene	Fuel					Liquid	Unintentional	Oral	Difficulty		Yes	No	No		No	No	No	Activated	Admission to Hospital	stable
1		MALE	1-5	SAUDI	Saudi Arabia	AlQrayat Region	AlQrayat General Hospital	Chemical Poisoning	Confirmed	Recovered		home		17/02/2020	17/02/2020	stable	Chemical	Kerosene	Fuel					Liquid	Unintentional	Oral											No Admission to Hospital
1		MALE	1-5	NON-SAUDI	Syrian Arab Republic	AlQrayat Region	AlQrayat General Hospital	Chemical Poisoning	Confirmed			home		23/02/2020	23/02/2020	stable	Chemical	Kerosene	Fuel					Liquid	Unintentional	Oral										Activated	Admission to Hospital	stable
2		MALE	1-5	SAUDI	Saudi Arabia	AlQrayat Region	AlQrayat General Hospital	Chemical Poisoning	Confirmed	Recovered		home		05/03/2020	05/03/2020	stable	Chemical	Kerosene	Fuel					Liquid	Occupational	Oral											DAMA	stable
2		FEMALE	1-5	SAUDI	Saudi Arabia	AlQrayat Region	AlQrayat General Hospital	Chemical Poisoning	Confirmed	Recovered		home		13/05/2020	13/05/2020	stable	Chemical	Kerosene	Fuel					Liquid	Unintentional	Oral										Activated	No Admission to Hospital	stable
1		FEMALE	1-5	SAUDI	Saudi Arabia	Hail Region	AlGhazalah Sector	Chemical Poisoning	Confirmed	DAMA	10.6	home		22/07/2020	22/07/2020	stable	Chemical	Kerosene	Fuel					Liquid	Unknown	Oral	Vomiting	3931	No	No	No		Yes	No	No	Others	DAMA	stable
5		MALE	1-5	SAUDI	Saudi Arabia	Northern Borders Region	Maternity and Children Hospital in Northern Borders	Chemical Poisoning	Confirmed	Recovered	12	home		29/11/2020	30/11/2020	stable	Chemical	Kerosene	Fuel					Liquid	Unintentional	Oral	Others			Yes			Yes				Admission to Hospital	stable
1		FEMALE	1-5	SAUDI	Saudi Arabia	AlQrayat Region	AlQrayat General Hospital	Chemical Poisoning	Confirmed			home		09/12/2020	09/12/2020	stable	Chemical	Kerosene	Fuel					Liquid	Unintentional	Oral										Activated	Admission to Hospital	stable
6		MALE	6-12	SAUDI	Saudi Arabia	AlQrayat Region	AlQrayat General Hospital	Chemical Poisoning	Confirmed	Recovered		home		19/07/2020	19/07/2020	stable	Chemical	Kerosene	Fuel					Liquid	Unintentional	Oral										Activated	Admission to Hospital	stable
2		FEMALE	1-5	SAUDI	Saudi Arabia	Northern Borders Region	Maternity and Children Hospital in Northern Borders	Chemical Poisoning	Confirmed	Recovered	10	home		06/01/2020	07/01/2020	stable	Chemical	Kerosene	Fuel					Liquid	Unintentional	Oral	Vomiting		Yes				Yes				Admission to Hospital	stable
1		MALE	1-5	SAUDI	Saudi Arabia	AlQrayat Region	AlQrayat General Hospital	Chemical Poisoning	Confirmed	Recovered		home		19/01/2020	19/01/2020	stable	Chemical	Kerosene	Fuel					Liquid	Unintentional	Oral										Activated	Admission to Hospital	stable
1		FEMALE	1-5	SAUDI	Saudi Arabia	AlQrayat Region	AlQrayat General Hospital	Chemical Poisoning	Confirmed	Recovered		home		01/04/2020	01/04/2020	stable	Chemical	Kerosene	Fuel					Liquid	Unintentional	Oral										Activated	No Admission to Hospital	stable
1		FEMALE	1-5	SAUDI	Saudi Arabia	AlQrayat Region	AlQrayat General Hospital	Chemical Poisoning	Confirmed	Recovered		home		27/07/2020	27/07/2020	stable	Chemical	Kerosene	Fuel					Liquid	Unintentional	Oral										Activated	Admission to Hospital	stable
14		MALE	13-19	SAUDI	Saudi Arabia	AlQrayat Region	AlQrayat General Hospital	Chemical Poisoning	Confirmed	Recovered		home		09/08/2020	09/08/2020	stable	Chemical	Kerosene	Fuel					Liquid	Unintentional	Oral										Activated	No Admission to Hospital	stable
3		FEMALE	1-5	SAUDI	Saudi Arabia	Northern Borders Region	NA	Chemical Poisoning	Confirmed	Recovered		home		24/12/2020	24/12/2020	stable	Chemical	Kerosene	Fuel					Liquid	Unintentional	Oral							Yes				Admission to Hospital	stable
1		MALE	1-5	SAUDI	Saudi Arabia	Northern Borders Region	NA	Chemical Poisoning	Confirmed	Recovered		home		27/12/2020	27/12/2020	stable	Chemical	Kerosene	Fuel					Liquid	Unintentional	Oral	Abdominal						Yes				Admission to Hospital	stable
2		MALE	1-5	SAUDI	Saudi Arabia	AlQrayat Region	AlQrayat General Hospital	Chemical Poisoning	Confirmed	Recovered		home		17/03/2021	10/02/2021	stable	Chemical	Kerosene	Fuel					Liquid	Unintentional	Oral										Activated	Admission to Hospital	stable
