# Supplementary material for: Epidemiology of kerosene poisoning in Saudi Arabia: a retrospective analysis
Source: PeerJ. 2025 Mar 19;13:e19094. doi: 10.7717/peerj.19094 (PMC11929502; doi:10.7717/peerj.19094)
Supplement: Supplemental Information 4 — Includes variables such as patient demographics, poisoning incidents, treatment outcomes, and geographic distribution. [file peerj-13-19094-s004.xlsx]

## Sheet: Sheet1
Age in years	Death date	Gender	Age Group	Saudi	NATIONALITY	region	Diagnosis	Class	Outcome	Weight (kg)	Place of incidence	If other	Date of Exposure	Date of Sign and Symptoms	Arrival to Hospital Condition	Type of Poisoning	Substance Name	Chemical Type	If other_1	Drug Name	Durg Type	If other_2	Physical form of Poisoning	Circumstances of Exposure	Route of Exposure	Sign and Symptoms	Hospital Sample No	Hospital : Blood Sample	Hospital : Urine Sample	Hospital : Gastric Sample	Toxicological Center Sample No	Toxicological : Blood Sample	Toxicological : Urine Sample	Sample of Poisoning Substance	Antidote Used	Management	Discharge from Hospital
1		MALE	1-5	SAUDI	Saudi Arabia	AlQrayat Region	Chemical Poisoning	Confirmed					21/01/2021	21/01/2021	stable	Chemical	Kerosene	Fuel																		Admission to Hospital	stable
0		FEMALE	<1	SAUDI	Saudi Arabia	Northern Borders Region	Chemical Poisoning	Confirmed	Recovered	9	home		07/03/2021	07/03/2021	stable	Chemical	Kerosene	Fuel					Gas	Unintentional	Oral	Vomiting						Yes				Admission to Hospital
1		FEMALE	1-5	SAUDI	Saudi Arabia	AlJouf Region	Chemical Poisoning	Confirmed	Recovered	14	home		20/12/2021	20/12/2021	stable	Chemical	Kerosene	Fuel					Liquid	Unintentional	Oral	Others		No	No	No		Yes	No	No	Activated	No Admission to Hospital	stable
2		MALE	1-5	SAUDI	Saudi Arabia	Northern Borders Region	Chemical Poisoning	Confirmed	Recovered	14	home		18/07/2021	18/07/2021	stable	Chemical	Kerosene	Fuel					Liquid	Unintentional	Oral	Nausea			Yes			Yes				Admission to Hospital	stable
2		MALE	1-5	NON-SAUDI	Syrian Arab Republic	Northern Borders Region	Chemical Poisoning	Confirmed	Recovered	12	home		07/08/2021	08/08/2021	stable	Chemical	Kerosene	Fuel					Liquid	Unintentional	Oral	Vomiting		No	Yes			Yes				Admission to Hospital	stable
1		FEMALE	1-5	SAUDI	Saudi Arabia	AlJouf Region	Chemical Poisoning	Confirmed		12	other	البيت	01/12/2021	01/12/2021	stable	Chemical	Kerosene	Fuel					Liquid	Unintentional	Oral			No	No	No		No	No	No	Activated	DAMA	stable
1		MALE	1-5	SAUDI	Saudi Arabia	AlQrayat Region	Chemical Poisoning	Confirmed	Recovered		home		15/06/2021	15/06/2021	stable	Chemical	Kerosene	Fuel						Unintentional	Oral											DAMA	stable
0		FEMALE	<1	SAUDI	Saudi Arabia	AlQrayat Region	Chemical Poisoning	Confirmed	Recovered		home		07/07/2021	07/07/2021	stable	Chemical	Kerosene	Fuel						Unintentional	Oral											Admission to Hospital	stable
2		FEMALE	1-5	SAUDI	Saudi Arabia	Northern Borders Region	Chemical Poisoning	Confirmed	Recovered		home		28/02/2021	28/02/2021	stable	Chemical	Kerosene	Fuel					Gas	Unintentional	Oral	Others						Yes				Admission to Hospital
1		FEMALE	1-5	SAUDI	Saudi Arabia	AlJouf Region	Chemical Poisoning	Confirmed	Recovered		home		20/12/2021	20/12/2021	stable	Chemical	Kerosene	Fuel					Solid	Unintentional	Oral	Others		No	No	No		Yes	No		Activated	No Admission to Hospital	stable
3		MALE	1-5	SAUDI	Saudi Arabia	AlJouf Region	Chemical Poisoning	Confirmed	Recovered	11.9	home		20/12/2021	20/12/2021	stable	Chemical	Kerosene	Fuel					Liquid	Unintentional	Oral	Others		No	No	Yes		Yes	No	No	Activated	No Admission to Hospital	stable
1		FEMALE	1-5	SAUDI	Saudi Arabia	AlJouf Region	Chemical Poisoning	Confirmed	Recovered	11	other	البيت	14/02/2021	14/02/2021	stable	Chemical	Kerosene	Fuel					Liquid	Unintentional	Oral	Nausea		No	No	No		Yes	No	No		Admission to Hospital	stable
2		MALE	1-5	SAUDI	Saudi Arabia	AlJouf Region	Chemical Poisoning	Confirmed		7.5	home		07/10/2021	07/10/2021	stable	Chemical	Kerosene	Fuel					Liquid	Unintentional	Oral			No	No	No		Yes	No		Activated	DAMA	stable
0		MALE	<1	SAUDI	Saudi Arabia	AlJouf Region	Drug Overdosage Poisoning	Confirmed	Recovered	12	home		21/12/2021	21/12/2021	stable	Chemical	Kerosene	Fuel					Liquid	Unintentional	Oral	Others		No	No	No		Yes	No	No	Activated	No Admission to Hospital	stable
1		FEMALE	1-5	SAUDI	Saudi Arabia	AlJouf Region	Chemical Poisoning	Confirmed	Recovered		other	المنزل	16/01/2021	16/01/2021	stable	Chemical	Kerosene	Fuel					Liquid	Unintentional	Oral	Headache		No	No	No		Yes	No	No		Admission to Hospital	stable
4		FEMALE	1-5	SAUDI	Saudi Arabia	AlQrayat Region	Chemical Poisoning	Confirmed			home		09/02/2021	09/02/2021	stable	Chemical	Kerosene	Fuel						Unknown	Oral											No Admission to Hospital	stable
75		MALE	>39	SAUDI	Saudi Arabia	Asir Region	Chemical Poisoning	Confirmed			home		08/03/2021	08/03/2021	stable	Chemical	Kerosene	Fuel					Liquid	Unintentional	Oral	Abdominal		No	No	No		No	No	No		No Admission to Hospital	stable
7		FEMALE	6-12	SAUDI	Saudi Arabia	AlQrayat Region	Chemical Poisoning	Confirmed			home		13/04/2021	13/04/2021	stable	Chemical	Kerosene	Fuel						Unintentional	Oral											DAMA	stable
2		FEMALE	1-5	SAUDI	Saudi Arabia	Hail Region	Chemical Poisoning	Confirmed	Recovered		home		16/02/2021	18/02/2021	stable	Chemical	Kerosene	Fuel					Gas	Unintentional	Oral	Nausea		No	No	No		No	No	No		Admission to Hospital	stable
3		FEMALE	1-5	SAUDI	Saudi Arabia	AlQrayat Region	Chemical Poisoning	Confirmed			home		14/03/2021	14/03/2021	stable	Chemical	Kerosene	Fuel						Unknown	Oral											DAMA	stable
6		MALE	6-12	SAUDI	Saudi Arabia	AlQrayat Region	Chemical Poisoning	Confirmed			home		24/03/2021	24/03/2021	stable	Chemical	Kerosene	Fuel						Unknown	Oral											Admission to Hospital	stable
1		MALE	1-5	SAUDI	Saudi Arabia	Northern Borders Region	Chemical Poisoning	Confirmed	Recovered	12	home		08/07/2021	08/07/2021	stable	Chemical	Kerosene	Fuel						Unintentional	Oral							Yes				Admission to Hospital
2		MALE	1-5	SAUDI	Saudi Arabia	AlJouf Region	Chemical Poisoning	Confirmed	DAMA		home		21/04/2021	21/04/2021	stable	Chemical	Kerosene	Fuel					Liquid	Unintentional	Oral	Vomiting		No	No	No		Yes	No	No		DAMA	stable
6		FEMALE	6-12	SAUDI	Saudi Arabia	AlJouf Region	Drug Overdosage Poisoning	Confirmed		13	home		04/10/2021	04/10/2021	stable	Chemical	Kerosene	Fuel					Liquid	Unintentional	Oral			No	No	No		Yes	No	No	Activated	Admission to Hospital	stable
2		MALE	1-5	SAUDI	Saudi Arabia	AlJouf Region	Chemical Poisoning	Confirmed		10	other	البيت	17/11/2021	17/11/2021	stable	Chemical	Kerosene	Fuel					Liquid	Unintentional	Oral			No	No	No		No	No	No	Activated	No Admission to Hospital	stable
1		MALE	1-5	SAUDI	Saudi Arabia	AlQrayat Region	Chemical Poisoning	Confirmed			home		09/02/2021	09/02/2021	stable	Chemical	Kerosene	Fuel						Unknown	Oral											DAMA	stable
1		MALE	1-5	SAUDI	Saudi Arabia	Northern Borders Region	Chemical Poisoning	Confirmed	Recovered		home		13/02/2021	14/02/2021	stable	Chemical	Kerosene	Fuel						Unintentional	Oral	Vomiting		Yes				Yes				Admission to Hospital	stable
7		MALE	6-12	SAUDI	Saudi Arabia	Northern Borders Region	Chemical Poisoning	Confirmed	Recovered		home		13/02/2021	14/02/2021	stable	Chemical	Kerosene	Fuel						Unintentional	Oral	Abdominal			Yes			Yes				Admission to Hospital	stable
2		FEMALE	1-5	SAUDI	Saudi Arabia	AlQrayat Region	Chemical Poisoning	Confirmed			home		11/04/2021	11/04/2021	stable	Chemical	Kerosene	Fuel						Unintentional	Oral											DAMA	stable
3		FEMALE	1-5	SAUDI	Saudi Arabia	AlJouf Region	Chemical Poisoning	Confirmed	Recovered	13	home		27/04/2021	27/04/2021	stable	Chemical	Kerosene	Fuel					Liquid	Unintentional	Oral	Nausea		No	No	No		Yes	Yes	No	Others	Admission to Hospital	stable
3		MALE	1-5	SAUDI	Saudi Arabia	AlQrayat Region	Chemical Poisoning	Confirmed			home		24/05/2021	24/05/2021	stable	Chemical	Kerosene	Fuel						Unintentional	Oral											No Admission to Hospital	stable
1		MALE	1-5	SAUDI	Saudi Arabia	AlQrayat Region	Chemical Poisoning	Confirmed			home		14/10/2021	14/10/2021	stable	Chemical	Kerosene	Fuel						Unintentional	Oral											Admission to Hospital
2		FEMALE	1-5	SAUDI	Saudi Arabia	AlJouf Region	Chemical Poisoning	Confirmed	Recovered		other	المنزل	25/11/2021	25/11/2021	stable	Chemical	Kerosene	Fuel					Liquid	Unintentional	Oral	Vomiting		No	No	No		No	No	No		Admission to Hospital	stable
4		FEMALE	1-5	SAUDI	Saudi Arabia	AlJouf Region	Chemical Poisoning	Confirmed	Recovered	15	home		16/12/2021	16/12/2021	stable	Chemical	Kerosene	Fuel					Liquid	Unintentional	Oral			No	No	No		Yes	No	No	Activated	DAMA	stable
2		MALE	1-5	SAUDI	Saudi Arabia	Northern Borders Region	Chemical Poisoning	Confirmed	Recovered		home		24/01/2021	24/01/2021	stable	Chemical	Kerosene	Fuel						Unintentional	Oral	Skin						Yes				Admission to Hospital	stable
2		MALE	1-5	SAUDI	Saudi Arabia	Hail Region	Chemical Poisoning	Confirmed	Other	18	home		03/02/2021	03/02/2021	stable	Chemical	Kerosene	Fuel					Liquid	Unintentional	Oral	Vomiting	no	No	No	No		No	No	No		Transfer to another Hospital	stable
1		MALE	1-5	SAUDI	Saudi Arabia	AlQrayat Region	Chemical Poisoning	Confirmed			home		01/03/2021	01/03/2021	stable	Chemical	Kerosene	Fuel						Unknown	Oral											DAMA	stable
3		MALE	1-5	SAUDI	Saudi Arabia	AlQrayat Region	Chemical Poisoning	Confirmed			home		25/03/2021	25/03/2021	stable	Chemical	Kerosene	Fuel						Unknown	Oral											No Admission to Hospital	stable
1		MALE	1-5	SAUDI	Saudi Arabia	AlJouf Region	Chemical Poisoning	Confirmed	Recovered		other	المنزل	10/11/2021	10/11/2021	stable	Chemical	Kerosene	Fuel						Unintentional	Oral	Nausea		No	No	No		Yes	No	No		Admission to Hospital	stable
3		MALE	1-5	SAUDI	Saudi Arabia	AlJouf Region	Drug Overdosage Poisoning	Suspect		13	other	البيت	14/11/2021	14/11/2021	stable	Chemical	Kerosene	Fuel					Liquid	Unintentional	Oral			No	No	No		No	No	No	Activated	DAMA	stable
1		MALE	1-5	SAUDI	Saudi Arabia	Jazan Region	Chemical Poisoning	Suspect		10	home		25/11/2021	25/11/2021	stable	Chemical	Kerosene	Fuel					Liquid	Unintentional	Oral	Others		No	No	No		Yes	No	No		DAMA	stable
4		MALE	1-5	SAUDI	Saudi Arabia	AlJouf Region	Chemical Poisoning	Confirmed	Recovered		home		20/12/2021	20/12/2021	stable	Chemical	Kerosene	Fuel					Liquid	Unintentional	Oral	Others		No	No	No		Yes	No	No	Activated	No Admission to Hospital	stable
1		MALE	1-5	SAUDI	Saudi Arabia	AlQrayat Region	Drug Overdosage Poisoning	Confirmed					21/01/2021	21/01/2021	stable	Chemical	Kerosene	Fuel																		Admission to Hospital	stable
3		MALE	1-5	SAUDI	Saudi Arabia	Northern Borders Region	Chemical Poisoning	Confirmed	Recovered		home		24/01/2021	24/01/2021	stable	Chemical	Kerosene	Fuel						Unintentional	Oral							Yes				Admission to Hospital	stable
4		FEMALE	1-5	SAUDI	Saudi Arabia	AlQrayat Region	Chemical Poisoning	Confirmed			home		04/04/2021	04/04/2021	stable	Chemical	Kerosene	Fuel					Liquid	Unintentional	Oral	Vomiting										DAMA	stable
2		MALE	1-5	SAUDI	Saudi Arabia	AlJouf Region	Chemical Poisoning	Confirmed		14	other	البيت	01/12/2021	01/12/2021	stable	Chemical	Kerosene	Fuel					Liquid	Unintentional	Oral			No	No	No		No	No	No	Activated	DAMA	stable
1		MALE	1-5	SAUDI	Saudi Arabia	AlJouf Region	Chemical Poisoning	Confirmed	Recovered	11	home		21/12/2021	21/12/2021	stable	Chemical	Kerosene	Fuel					Liquid	Unintentional	Oral	Others		No	No	No		Yes	No	Yes	Activated	No Admission to Hospital	stable
2		FEMALE	1-5	SAUDI	Saudi Arabia	Northern Borders Region	Chemical Poisoning	Confirmed	Recovered		home		24/12/2021	28/12/2021	stable	Chemical	Kerosene	Fuel					Liquid	Unintentional	Oral	Vomiting			Yes			Yes				Admission to Hospital	stable
1		FEMALE	1-5	SAUDI	Saudi Arabia	AlQrayat Region	Chemical Poisoning	Confirmed	Recovered		home		23/06/2021	23/06/2021	stable	Chemical	Kerosene	Fuel					Liquid	Unintentional	Oral										Activated	No Admission to Hospital	stable
1		MALE	1-5	SAUDI	Saudi Arabia	AlQrayat Region	Chemical Poisoning	Confirmed	Recovered		home		21/11/2021	21/11/2021	stable	Chemical	Kerosene	Fuel						Unintentional	Oral	Difficulty									Oxygen	DAMA	stable
4		MALE	1-5	SAUDI	Saudi Arabia	AlQrayat Region	Chemical Poisoning	Confirmed			home		25/03/2021	25/03/2021	stable	Chemical	Kerosene	Fuel						Unknown	Oral											DAMA	stable
9		MALE	6-12	SAUDI	Saudi Arabia	Northern Borders Region	Chemical Poisoning	Confirmed	Recovered		home		26/05/2021	27/05/2021	stable	Chemical	Kerosene	Fuel					Liquid	Unintentional	Oral	Abdominal			Yes			Yes				Admission to Hospital	stable
4		MALE	1-5	SAUDI	Saudi Arabia	AlQrayat Region	Chemical Poisoning	Confirmed	Recovered		home		28/11/2021	28/11/2021	stable	Chemical	Kerosene	Fuel					Liquid	Unintentional	Oral	Nausea									Activated	No Admission to Hospital	stable
2		FEMALE	1-5	SAUDI	Saudi Arabia	AlJouf Region	Chemical Poisoning	Confirmed	Recovered	14	home		22/12/2021	22/12/2021	stable	Chemical	Kerosene	Fuel					Liquid	Unintentional	Oral	Others		No	No	No		Yes	No	No	Activated	No Admission to Hospital	stable
1		FEMALE	1-5	SAUDI	Saudi Arabia	AlJouf Region	Chemical Poisoning	Confirmed	Recovered	10	home		22/12/2021	22/12/2021	stable	Chemical	Kerosene	Fuel					Liquid	Unintentional	Oral	Others		No	No	No		Yes	No	No	Activated	No Admission to Hospital	stable
1		FEMALE	1-5	SAUDI	Saudi Arabia	AlJouf Region	Chemical Poisoning	Confirmed	Recovered	12	home		22/12/2021	22/12/2021	stable	Chemical	Kerosene	Fuel					Liquid	Unintentional	Oral	Others		No	No	No		Yes	No	No	Activated	No Admission to Hospital	stable
2		MALE	1-5	SAUDI	Saudi Arabia	AlQrayat Region	Chemical Poisoning	Confirmed			home		26/12/2021	26/12/2021	stable	Chemical	Kerosene	Fuel					Liquid	Unintentional	Oral							Yes				Admission to Hospital
1		FEMALE	1-5	SAUDI	Saudi Arabia	AlQrayat Region	Chemical Poisoning	Confirmed			home		28/02/2021	28/02/2021	stable	Chemical	Kerosene	Fuel						Unintentional	Oral											DAMA	stable
2		FEMALE	1-5	SAUDI	Saudi Arabia	AlJouf Region	Chemical Poisoning	Confirmed	Recovered		other	البيت	25/02/2021	25/02/2021	stable	Chemical	Kerosene	Fuel					Liquid	Unintentional	Oral	Headache		No	No	No		Yes	No	No		Admission to Hospital	stable
1		MALE	1-5	NOT ENTERD		Riyadh Region	Chemical Poisoning	Confirmed			home		07/03/2021	03/03/2021	stable	Chemical	Kerosene	Fuel					Liquid	Unintentional	Oral	Difficulty, Vomiting										No Admission to Hospital	stable
1		MALE	1-5	SAUDI	Saudi Arabia	AlQrayat Region	Chemical Poisoning	Confirmed			home		22/03/2021	22/03/2021	stable	Chemical	Kerosene	Fuel						Unknown	Oral											DAMA	stable
0		MALE	<1	SAUDI	Saudi Arabia	AlQrayat Region	Chemical Poisoning	Confirmed			home		15/04/2021	15/04/2021	stable	Chemical	Kerosene	Fuel						Unintentional	Oral											DAMA	stable
2		MALE	1-5	SAUDI	Saudi Arabia	AlJouf Region	Drug Overdosage Poisoning	Confirmed	DAMA	15	home		03/01/2021	03/01/2021	stable	Chemical	Kerosene	Fuel					Liquid	Unintentional	Oral	Difficulty		No	No	No		Yes	No	No		Admission to Hospital	stable
1		FEMALE	1-5	SAUDI	Saudi Arabia	AlQrayat Region	Chemical Poisoning	Confirmed			home		14/10/2021	14/10/2021	stable	Chemical	Kerosene	Fuel					Liquid	Unintentional	Oral							Yes			Activated	No Admission to Hospital	stable
2		MALE	1-5	SAUDI	Saudi Arabia	AlJouf Region	Chemical Poisoning	Confirmed		13	home		14/12/2021	14/12/2021	stable	Chemical	Kerosene	Fuel					Gas	Unintentional	Inhalation			No	No	No		No	No	No	Activated	Admission to Hospital	stable
6		MALE	6-12	SAUDI	Saudi Arabia	AlJouf Region	Chemical Poisoning	Confirmed	Recovered	17	home		20/12/2021	20/12/2021	stable	Chemical	Kerosene	Fuel					Liquid	Unintentional	Oral	Others		No	No	No		Yes	No		Activated	No Admission to Hospital	stable
3		MALE	1-5	SAUDI	Saudi Arabia	AlQrayat Region	Chemical Poisoning	Confirmed			home		09/02/2021	09/02/2021	stable	Chemical	Kerosene	Fuel						Unknown	Oral											DAMA	stable
0		MALE	<1	SAUDI	Saudi Arabia	AlQrayat Region	Chemical Poisoning	Confirmed	Recovered		home		05/05/2021	05/05/2021	stable	Chemical	Kerosene	Fuel						Unintentional	Oral										Activated	No Admission to Hospital	stable
4		MALE	1-5	SAUDI	Saudi Arabia	AlJouf Region	Chemical Poisoning	Confirmed	Recovered	17	home		18/03/2021	18/03/2021	stable	Chemical	Kerosene	Fuel					Liquid	Unintentional	Oral			No	No	No		Yes	No	No	Others	No Admission to Hospital	stable
1		MALE	1-5	SAUDI	Saudi Arabia	AlJouf Region	Chemical Poisoning	Confirmed	Recovered				13/01/2021	18/01/2021	stable	Chemical	Kerosene	Fuel					Liquid	Unintentional	Oral			No	No	No		Yes	No			Admission to Hospital	stable
2		MALE	1-5	SAUDI	Saudi Arabia	AlQrayat Region	Chemical Poisoning	Confirmed			home		10/02/2021	10/02/2021	stable	Chemical	Kerosene	Fuel						Unknown	Oral											No Admission to Hospital	stable
1		MALE	1-5	SAUDI	Saudi Arabia	Hail Region	Chemical Poisoning	Confirmed	Recovered		home		18/02/2021	18/02/2021	stable	Chemical	Kerosene	Fuel					Liquid	Unintentional	Oral	Vomiting		No	No	No		Yes	No	No		Admission to Hospital	stable
2		MALE	1-5	SAUDI	Saudi Arabia	AlQrayat Region	Chemical Poisoning	Confirmed					21/01/2021	21/01/2021	stable	Chemical	Kerosene	Fuel																		Admission to Hospital	stable
2		MALE	1-5	SAUDI	Saudi Arabia	AlQrayat Region	Chemical Poisoning	Confirmed			home		10/02/2021	10/02/2021	stable	Chemical	Kerosene	Fuel						Unknown	Oral											Admission to Hospital	stable
2		FEMALE	1-5	SAUDI	Saudi Arabia	AlQrayat Region	Drug Overdosage Poisoning	Confirmed			home		04/04/2021	04/04/2021	stable	Chemical	Kerosene	Fuel					Liquid	Unintentional	Oral											No Admission to Hospital	stable
0		MALE	<1	SAUDI	Saudi Arabia	AlJouf Region	Chemical Poisoning	Confirmed	Recovered	13	home		21/12/2021	21/12/2021	stable	Chemical	Kerosene	Fuel					Liquid	Unintentional	Oral	Others		No	No	No		Yes	No	No	Activated	No Admission to Hospital	stable
1		MALE	1-5	SAUDI	Saudi Arabia	AlJouf Region	Chemical Poisoning	Confirmed	Recovered	15	home		21/12/2021	21/12/2021	stable	Chemical	Kerosene	Fuel					Liquid	Unintentional	Oral	Others		No	No	No		Yes	No	No	Activated	No Admission to Hospital	stable
2		FEMALE	1-5	SAUDI	Saudi Arabia	AlJouf Region	Chemical Poisoning	Confirmed	Recovered	14	home		22/12/2021	22/12/2021	stable	Chemical	Kerosene	Fuel					Liquid	Unintentional	Oral	Others		No	No	No		Yes	No	No	Activated	No Admission to Hospital	stable
1		MALE	1-5	SAUDI	Saudi Arabia	Jazan Region	Chemical Poisoning	Suspect		10	home		23/12/2021	23/12/2021	stable	Chemical	Kerosene	Fuel					Liquid	Unintentional	Oral	Difficulty		No	No	No		Yes	No	No		Admission to Hospital	stable
2		FEMALE	1-5	SAUDI	Saudi Arabia	Northern Borders Region	Chemical Poisoning	Confirmed	Recovered		home		07/02/2021	07/02/2021	stable	Chemical	Kerosene	Fuel					Liquid	Unintentional	Oral	Nausea			Yes			Yes				No Admission to Hospital	stable
1		FEMALE	1-5	SAUDI	Saudi Arabia	AlQrayat Region	Chemical Poisoning	Confirmed	Recovered		home		11/01/2021	11/01/2021	stable	Chemical	Kerosene	Fuel					Liquid	Unintentional	Oral										Activated	Admission to Hospital	stable
1		MALE	1-5	SAUDI	Saudi Arabia	AlQrayat Region	Chemical Poisoning	Confirmed			home		25/03/2021	25/03/2021	stable	Chemical	Kerosene	Fuel						Unknown	Oral											No Admission to Hospital	stable
0		FEMALE	<1	SAUDI	Saudi Arabia	AlJouf Region	Chemical Poisoning	Confirmed	Recovered	9	home		21/12/2021	21/12/2021	stable	Chemical	Kerosene	Fuel					Liquid	Unintentional	Oral	Others		No	No	No		Yes	No	No	Activated	No Admission to Hospital	stable
2		FEMALE	1-5	SAUDI	Saudi Arabia	Northern Borders Region	Chemical Poisoning	Confirmed	Recovered		home		31/01/2021	31/01/2021	stable	Chemical	Kerosene	Fuel					Liquid	Unintentional	Oral							Yes				Admission to Hospital	stable
6		FEMALE	6-12	SAUDI	Saudi Arabia	AlQrayat Region	Chemical Poisoning	Confirmed			home		01/03/2021	01/03/2021	stable	Chemical	Kerosene	Fuel						Unknown	Oral											DAMA	stable
1		MALE	1-5	SAUDI	Saudi Arabia	AlQrayat Region	Chemical Poisoning	Confirmed			home		21/03/2021	21/03/2021	stable	Chemical	Kerosene	Fuel						Unknown	Oral											DAMA	stable
1		MALE	1-5	SAUDI	Saudi Arabia	AlQrayat Region	Drug Overdosage Poisoning	Confirmed			home		14/10/2021	14/10/2021	stable	Chemical	Kerosene	Fuel					Liquid	Unintentional	Oral							Yes				Admission to Hospital	stable
8		MALE	6-12	SAUDI	Saudi Arabia	AlJouf Region	Chemical Poisoning	Confirmed	Recovered		home		28/10/2021	28/10/2021	stable	Chemical	Kerosene	Fuel						Unintentional	Others1	Others		No	No	No		No	No	No		Admission to Hospital	stable
2		MALE	1-5	SAUDI	Saudi Arabia	AlJouf Region	Chemical Poisoning	Confirmed	Recovered		other	المنزل	17/02/2021	17/02/2021	stable	Chemical	Kerosene	Fuel					Liquid	Unintentional	Oral	Others		No	No	No		Yes	No	No		Admission to Hospital	stable
2		FEMALE	1-5	SAUDI	Saudi Arabia	AlQrayat Region	Chemical Poisoning	Confirmed			home		01/03/2021	01/03/2021	stable	Chemical	Kerosene	Fuel						Unknown	Oral											DAMA	stable
4		MALE	1-5	SAUDI	Saudi Arabia	AlJouf Region	Chemical Poisoning	Confirmed	Recovered	17	home		17/03/2021	18/03/2021	stable	Chemical	Kerosene	Fuel					Liquid	Unintentional	Oral	Vomiting		No	No	No		Yes	No	No		No Admission to Hospital	stable
3		MALE	1-5	SAUDI	Saudi Arabia	AlJouf Region	Chemical Poisoning	Confirmed	Recovered		home		11/07/2021	11/07/2021	stable	Chemical	Kerosene	Fuel						Unknown	Oral	Fever		No	No	No		Yes	No	No		DAMA
6		FEMALE	6-12	SAUDI	Saudi Arabia	AlJouf Region	Chemical Poisoning	Confirmed	Recovered		other	المنزل	24/11/2021	24/11/2021	stable	Chemical	Kerosene	Fuel					Liquid	Unintentional	Oral	Vomiting		No	No	No		No	No	No		Admission to Hospital	stable
3		FEMALE	1-5	SAUDI	Saudi Arabia	AlQrayat Region	Chemical Poisoning	Confirmed			home		18/04/2021	18/04/2021	stable	Chemical	Kerosene	Fuel					Liquid	Unintentional	Oral										Activated	No Admission to Hospital
5		MALE	1-5	SAUDI	Saudi Arabia	AlJouf Region	Chemical Poisoning	Confirmed	Recovered		other	البيت	12/02/2021	12/02/2021	stable	Chemical	Kerosene	Fuel					Liquid	Unintentional	Oral	Headache		No	No	No		Yes	No	No		Admission to Hospital	stable
2		FEMALE	1-5	SAUDI	Saudi Arabia	Riyadh Region	Chemical Poisoning	Confirmed			home		25/02/2021	25/02/2021	stable	Chemical	Kerosene	Fuel					Liquid	Unintentional	Oral	Vomiting										No Admission to Hospital	stable
1		MALE	1-5	SAUDI	Saudi Arabia	AlQrayat Region	Chemical Poisoning	Confirmed			home		14/03/2021	14/03/2021	stable	Chemical	Kerosene	Fuel						Occupational	Oral											No Admission to Hospital	stable
3		FEMALE	1-5	SAUDI	Saudi Arabia	AlQrayat Region	Chemical Poisoning	Confirmed			home		21/03/2021	21/03/2021	stable	Chemical	Kerosene	Fuel						Unknown	Oral											DAMA	stable
10		MALE	6-12	SAUDI	Saudi Arabia	AlJouf Region	Chemical Poisoning	Confirmed	Recovered		home		14/04/2021	14/04/2021	stable	Chemical	Kerosene	Fuel					Liquid	Unintentional	Oral			No	No	No		Yes	No	No		DAMA	stable
0		FEMALE	<1	SAUDI	Saudi Arabia	Hail Region	Chemical Poisoning	Suspect	DAMA	9	home		22/11/2021	23/11/2021	stable	Chemical	Kerosene	Fuel					Liquid	Unintentional	Oral	Vomiting	0	No	No	No	0	Yes	No	No		DAMA	stable
3		MALE	1-5	SAUDI	Saudi Arabia	AlJouf Region	Chemical Poisoning	Confirmed	Recovered		other	المنزل	10/01/2021	10/01/2021	stable	Chemical	Kerosene	Fuel					Liquid	Unintentional	Oral	Headache		No	No	No		Yes	No	No		Admission to Hospital	stable
2		MALE	1-5	SAUDI	Saudi Arabia	Tabouk Region	Chemical Poisoning	Confirmed	Recovered		home		26/01/2021	26/01/2021	stable	Chemical	Kerosene	Fuel						Unintentional	Oral	Vomiting		No	No	No		No	No	No		No Admission to Hospital
1		MALE	1-5	SAUDI	Saudi Arabia	AlTaif Region	Chemical Poisoning	Suspect		12.2	home		06/03/2021	06/03/2021	stable	Chemical	Kerosene	Fuel						Unknown	Oral											Admission to Hospital	stable
2		MALE	1-5	SAUDI	Saudi Arabia	Northern Borders Region	Chemical Poisoning	Confirmed	Recovered	15	home		14/05/2021	23/05/2021	stable	Chemical	Kerosene	Fuel					Liquid	Unintentional	Oral	Abdominal			Yes			Yes				Admission to Hospital	stable
6		MALE	6-12	SAUDI	Saudi Arabia	AlJouf Region	Chemical Poisoning	Confirmed		17.5	home		18/07/2021	18/07/2021	stable	Chemical	Kerosene	Fuel					Liquid	Unintentional	Oral			No	No	No		Yes	No	Yes	Activated	DAMA	stable
0		MALE	<1	SAUDI	Saudi Arabia	AlJouf Region	Chemical Poisoning	Confirmed	DAMA	13	home		18/11/2021	18/11/2021	stable	Chemical	Kerosene	Fuel					Liquid	Unintentional	Oral	Nausea		No	No	No		Yes	No	No		DAMA	stable
2		MALE	1-5	SAUDI	Saudi Arabia	AlJouf Region	Chemical Poisoning	Confirmed	DAMA		home		21/04/2021	21/04/2021	stable	Chemical	Kerosene	Fuel						Unintentional	Oral							Yes				DAMA	stable
3		FEMALE	1-5	SAUDI	Saudi Arabia	AlJouf Region	Chemical Poisoning	Confirmed		14	home		23/09/2021	23/09/2021	stable	Chemical	Kerosene	Fuel					Liquid	Unintentional	Oral			No	No	No		No	No	No	Activated	DAMA	stable
2		FEMALE	1-5	SAUDI	Saudi Arabia	AlQrayat Region	Drug Overdosage Poisoning	Confirmed			home		14/10/2021	14/10/2021	stable	Chemical	Kerosene	Fuel					Liquid	Unintentional	Oral							Yes			Activated	Admission to Hospital
1		FEMALE	1-5	SAUDI	Saudi Arabia	AlQrayat Region	Chemical Poisoning	Confirmed	Recovered		home		30/11/2021	30/11/2021	stable	Chemical	Kerosene	Fuel						Unintentional	Oral	Headache										Admission to Hospital	stable
2		MALE	1-5	SAUDI	Saudi Arabia	AlJouf Region	Chemical Poisoning	Confirmed	Recovered	7.5	home		20/12/2021	20/12/2021	stable	Chemical	Kerosene	Fuel					Liquid	Unintentional	Oral	Others		No	No	No		Yes	No	No	Activated	No Admission to Hospital	stable
2		FEMALE	1-5	SAUDI	Saudi Arabia	AlQrayat Region	Chemical Poisoning	Confirmed			home		28/02/2021	28/02/2021	stable	Chemical	Kerosene	Fuel						Unintentional	Oral											DAMA	stable
1		MALE	1-5	SAUDI	Saudi Arabia	AlQrayat Region	Chemical Poisoning	Confirmed			home		03/03/2021	03/03/2021	stable	Chemical	Kerosene	Fuel						Unknown	Oral											Admission to Hospital	stable
0		FEMALE	<1	SAUDI	Saudi Arabia	Northern Borders Region	Chemical Poisoning	Confirmed	Recovered	11	home		07/03/2021	07/03/2021	stable	Chemical	Kerosene	Fuel					Liquid	Unintentional	Oral							Yes				Admission to Hospital
3		FEMALE	1-5	SAUDI	Saudi Arabia	AlQrayat Region	Chemical Poisoning	Confirmed			home		21/03/2021	21/03/2021	stable	Chemical	Kerosene	Fuel						Unknown	Oral											No Admission to Hospital	stable
3		MALE	1-5	SAUDI	Saudi Arabia	AlJouf Region	Chemical Poisoning	Confirmed	Recovered	11	home		03/02/2021	03/02/2021	stable	Chemical	Kerosene	Fuel					Liquid	Unintentional	Oral	Fever		No	No	No		Yes	No	No		DAMA	stable
2		MALE	1-5	SAUDI	Saudi Arabia	AlJouf Region	Chemical Poisoning	Confirmed	Recovered		other	المنزل	23/11/2021	23/11/2021	stable	Chemical	Kerosene	Fuel					Liquid	Unintentional	Oral	Others		No	No	No		No	No	No		No Admission to Hospital	stable
2		MALE	1-5	SAUDI	Saudi Arabia	AlJouf Region	Chemical Poisoning	Confirmed		15	home		14/12/2021	14/12/2021	stable	Chemical	Kerosene	Fuel					Liquid	Unintentional	Oral			No	No	No		No	No	No	Activated	DAMA	stable
15		MALE	13-19	SAUDI	Saudi Arabia	AlJouf Region	Chemical Poisoning	Confirmed	Recovered	40	home		19/12/2021	19/12/2021	stable	Chemical	Kerosene	Fuel					Liquid	Unintentional	Oral	Others		No	No	No		Yes	No	No		No Admission to Hospital	stable
1		MALE	1-5	SAUDI	Saudi Arabia	AlQrayat Region	Chemical Poisoning	Confirmed			home		02/03/2021	02/03/2021	stable	Chemical	Kerosene	Fuel						Unknown	Oral											DAMA	stable
0		MALE	<1	SAUDI	Saudi Arabia	AlQrayat Region	Chemical Poisoning	Confirmed			home		15/04/2021	15/04/2021	stable	Chemical	Kerosene	Fuel						Unintentional	Oral											DAMA	stable
0		MALE	<1	SAUDI	Saudi Arabia	Hail Region	Chemical Poisoning	Confirmed	Recovered		home		25/06/2021	25/06/2021	stable	Chemical	Kerosene	Fuel					Liquid	Unintentional	Oral	Others		No	No	No		Yes	No	No	Oxygen	Admission to Hospital	stable
1		MALE	1-5	SAUDI	Saudi Arabia	AlQrayat Region	Chemical Poisoning	Confirmed	Recovered		home		11/11/2021	11/11/2021	stable	Chemical	Kerosene	Fuel					Liquid	Unintentional	Oral											Admission to Hospital
1		MALE	1-5	SAUDI	Saudi Arabia	Northern Borders Region	Chemical Poisoning	Confirmed	Recovered		home		23/03/2021	24/03/2021	stable	Chemical	Kerosene	Fuel					Liquid	Unintentional	Oral	Dizziness			Yes			Yes				Admission to Hospital	stable
2		MALE	1-5	SAUDI	Saudi Arabia	AlJouf Region	Drug Overdosage Poisoning	Confirmed	DAMA	15	home		11/07/2021	11/07/2021	stable	Chemical	Kerosene	Fuel					Liquid	Unintentional	Oral	Difficulty		No	No	No		No	No	No		Admission to Hospital	stable
2		FEMALE	1-5	SAUDI	Saudi Arabia	Northern Borders Region	Chemical Poisoning	Confirmed	Recovered		home		04/03/2021	04/03/2021	stable	Chemical	Kerosene	Fuel					Liquid	Unintentional	Oral							Yes				Admission to Hospital
1		MALE	1-5	SAUDI	Saudi Arabia	Northern Borders Region	Chemical Poisoning	Confirmed	Recovered		home		12/03/2021	14/03/2021	stable	Chemical	Kerosene	Fuel					Liquid	Unintentional	Oral	Vomiting			Yes			Yes				Admission to Hospital	stable
2		MALE	1-5	SAUDI	Saudi Arabia	Northern Borders Region	Chemical Poisoning	Confirmed	Recovered	14	home		09/11/2021	10/11/2021	stable	Chemical	Kerosene	Fuel					Liquid	Unintentional	Oral	Vomiting			Yes			Yes				Admission to Hospital	stable
3		MALE	1-5	SAUDI	Saudi Arabia	AlJouf Region	Chemical Poisoning	Confirmed			home		19/09/2021	19/09/2021	stable	Chemical	Kerosene	Fuel					Liquid	Unintentional	Oral			No	No	No		Yes	No	No	Activated	DAMA	stable
0		FEMALE	<1	SAUDI	Saudi Arabia	AlQrayat Region	Chemical Poisoning	Confirmed	Recovered		home		11/11/2021	11/11/2021	stable	Chemical	Kerosene	Fuel						Unintentional	Oral											DAMA	stable
2		MALE	1-5	SAUDI	Saudi Arabia	AlJouf Region	Chemical Poisoning	Confirmed	Recovered		other	المنزل	17/11/2021	17/11/2021	stable	Chemical	Kerosene	Fuel					Liquid	Unintentional	Oral	Difficulty		No	No	No		No	No	No		Admission to Hospital	stable
2		FEMALE	1-5	SAUDI	Saudi Arabia	AlJouf Region	Chemical Poisoning	Confirmed		12	other	البيت	01/12/2021	01/12/2021	stable	Chemical	Kerosene	Fuel					Liquid	Unintentional	Oral			No	No	No		Yes	No		Activated	Admission to Hospital	stable
2		FEMALE	1-5	SAUDI	Saudi Arabia	AlJouf Region	Chemical Poisoning	Confirmed	Recovered	13	home		22/12/2021	22/12/2021	stable	Chemical	Kerosene	Fuel					Liquid	Unintentional	Oral	Others		No	No	No		Yes	No	No	Activated	No Admission to Hospital	stable
2		FEMALE	1-5	SAUDI	Saudi Arabia	AlQrayat Region	Chemical Poisoning	Confirmed					21/01/2021	21/01/2021	stable	Chemical	Kerosene	Fuel																		DAMA	stable
1		MALE	1-5	SAUDI	Saudi Arabia	AlQrayat Region	Chemical Poisoning	Confirmed			home		25/03/2021	25/03/2021	stable	Chemical	Kerosene	Fuel						Unknown	Oral											DAMA	stable
1		FEMALE	1-5	SAUDI	Saudi Arabia	AlQrayat Region	Chemical Poisoning	Confirmed			home		14/01/2021	14/01/2021	stable	Chemical	Kerosene	Fuel					Liquid	Unintentional	Oral										Activated	Admission to Hospital	stable
2		FEMALE	1-5	SAUDI	Saudi Arabia	AlQrayat Region	Chemical Poisoning	Confirmed					21/01/2021	21/01/2021	stable	Chemical	Kerosene	Fuel																		Admission to Hospital	stable
2		MALE	1-5	SAUDI	Saudi Arabia	Northern Borders Region	Chemical Poisoning	Confirmed	Recovered	15	home		10/02/2021	11/02/2021	stable	Chemical	Kerosene	Fuel					Liquid	Unintentional	Oral	Vomiting										Admission to Hospital	stable
1		MALE	1-5	SAUDI	Saudi Arabia	AlQrayat Region	Chemical Poisoning	Confirmed			home		02/03/2021	02/03/2021	stable	Chemical	Kerosene	Fuel						Unknown	Oral											Admission to Hospital	stable
2		FEMALE	1-5	SAUDI	Saudi Arabia	AlQrayat Region	Chemical Poisoning	Suspect			home		14/09/2021	14/09/2021	stable	Chemical	Kerosene	Fuel						Unintentional	Oral											Admission to Hospital	stable
2		FEMALE	1-5	SAUDI	Saudi Arabia	Hail Region	Chemical Poisoning	Suspect	Recovered	11	home		19/11/2021	19/11/2021	stable	Chemical	Kerosene	Fuel					Liquid	Unintentional	Oral	Vomiting		No	No	No		No	No	No		No Admission to Hospital	stable
